1 **Mechanistic model of MAPK signaling reveals how**  
2 **allostery and rewiring contribute to drug resistance**

3 Fabian Fröhlich<sup>1,+</sup>, Luca Gerosa<sup>1,2+</sup>, Jeremy Muhlich<sup>1</sup> and Peter K. Sorger<sup>1,\*</sup>

4

5 **Affiliations:**

6 <sup>1</sup> Laboratory of Systems Pharmacology, Department of Systems Biology, Harvard Medical School, 200  
7 Longwood Avenue, Boston, MA 02115, USA

8 <sup>2</sup> Present Address: Genentech, Inc., South San Francisco, CA 94080

9 <sup>+</sup> These authors contributed equally.

10 **\* Corresponding author:**

11 [psorger@hms.harvard.edu](mailto:psorger@hms.harvard.edu), WAB432, 200 Longwood Avenue, Boston MA 02115

12 **Running title:** Model of drug resistance in melanoma

## 13 **ABSTRACT**

14 BRAF<sup>V600E</sup> is prototypical of oncogenic mutations that can be targeted therapeutically and treatment of  
15 BRAF-mutant melanomas with RAF and MEK inhibitors results in rapid tumor regression. However,  
16 drug-induced rewiring causes BRAF<sup>V600E</sup> melanoma cells to rapidly acquire a drug-adapted state. In  
17 patients this is thought to promote acquisition or selection for resistance mutations and disease recurrence.  
18 In this paper we use an energy-based implementation of ordinary differential equations in combination  
19 with proteomic, transcriptomic and imaging data from melanoma cells, to model the precise mechanisms  
20 responsible for adaptive rewiring. We demonstrate the presence of two parallel MAPK (RAF-MEK-ERK  
21 kinase) reaction channels in BRAF<sup>V600E</sup> melanoma cells that are differentially sensitive to RAF and MEK  
22 inhibitors. This arises from differences in protein oligomerization and allosteric regulation induced by  
23 oncogenic mutations and drug binding. As a result, the RAS-regulated MAPK channel can be active under  
24 conditions in which the BRAF<sup>V600E</sup>-driven channel is fully inhibited. Causal tracing demonstrates that this  
25 provides a sufficient quantitative explanation for initial and acquired responses to multiple different RAF  
26 and MEK inhibitors individually and in combination.

27

28 **Keywords: allosteric interactions, rewiring, kinetic modeling, drug resistance, MAPK pathway**

## 29 **Highlights**

- 30 ● A thermodynamic framework enables structure-based description of allosteric interactions in the  
31 EGFR and MAPK pathways
- 32 ● Causal decomposition of efficacy of targeted drugs elucidates rewiring of MAPK channels
- 33 ● Model-based extrapolation from type I½ RAF inhibitors to type II RAF inhibitors
- 34 ● A unified mechanistic explanation for adaptive and genetic resistance across BRAF-cancers

35

## 36 INTRODUCTION

37 Eukaryotic signal transduction allows cells to regulate their growth, differentiation, and morphogenesis in  
38 response to external stimuli (Hunter, 2000; Ullrich & Schlessinger, 1990). In its reliance on receptor  
39 tyrosine kinase (RTK) autophosphorylation, assembly of signaling complexes on receptor tails, and  
40 activation of mitogen activated protein kinases (MAPKs; **Box 1**) signal transduction initiated by the  
41 binding of epidermal growth factor (EGF) to the EGF receptor (EGFR) is prototypical of growth-  
42 promoting signal transduction systems. The MAPK cascade comprises the RAF, MEK and ERK kinases,  
43 which regulate downstream factors such as ELK, ETS1 and AP1 transcription factors, as well as changes  
44 in cell motility and morphology (Lavoie *et al*, 2020). EGFR signaling has also been studied extensively  
45 using dynamical systems analysis (Starbuck & Lauffenburger, 1992; Kholodenko *et al*, 1999; Resat *et al*,  
46 2003; Blinov *et al*, 2006; Chen *et al*, 2009; Gerosa *et al*, 2020) leading to better understanding of signal  
47 transduction in general as well as development of new modeling methods.

48 Oncogenic mutations are common in signal transduction networks and the V600E mutation in BRAF is  
49 an exemplar of these (Sanchez-Vega *et al*, 2018). In melanoma (Davies *et al*, 2002), thyroid cancer  
50 (Kebebew *et al*, 2007), colorectal cancer (Clarke & Kopetz, 2015), and other tissues, BRAF<sup>V600E</sup> mutations  
51 cause constitutive activation of the MAPK pathway and oncogenic transformation. In cutaneous  
52 melanoma, inhibitors of the BRAF (BRAFi) and MEK (MEKi) kinases (e.g., vemurafenib and  
53 cobimetinib) are prototypical of highly effective targeted anti-cancer drugs (English & Cobb, 2002;  
54 Samatar & Poulidakos, 2014). A combination of BRAFi and MEKi is the current first-line treatment for  
55 metastatic melanoma (Sullivan & Flaherty, 2012) and frequently results in rapid tumor shrinkage.  
56 However, BRAF<sup>V600E</sup> tumors usually develop resistance to RAFi/MEKi therapy within months to years,  
57 reducing long-term survival. The frequent and rapid rise of drug resistance in melanoma and the innate  
58 refractoriness of other MAPK-driven cancers to existing drugs has spurred extensive work aimed at  
59 understanding resistance mechanisms. Blocking the emergence of drug-resistant states is widely thought  
60 to be the key to achieving better patient outcomes with RAFi/MEKi drugs and precision oncology in  
61 general.

62 Resistance to MAPK inhibition occurs over a range of time scales. Adaptive resistance, which is reversible  
63 and does not involve acquisition or selection for mutations, can be observed within a few days of drug  
64 exposure (Fallahi-Sichani *et al*, 2017; Marin-Bejar *et al*, 2021; Oren *et al*, 2021). In cultured cells, adaptive  
65 resistance can last for months, giving rise to persister cells in which oncogenic BRAF signaling remains  
66 strongly inhibited but cells continue to grow, albeit more slowly than in the absence of drugs (Lito *et al*,

67 2012). In patients and in cultured cells, acquisition of recurrent mutations, commonly in RTKs or  
68 components (or regulators) of the MAPK cascade, leads to reactivation of MAPK signaling and  
69 unrestrained cell growth (Shi *et al*, 2014; Long *et al*, 2014). The relationship between adaptive and  
70 acquired resistance is not fully understood and is an area of active investigation (Shaffer *et al*, 2017; Schuh  
71 *et al*, 2020). It is thought that DNA replication may be less faithful, or DNA damage responses less  
72 effective, in adapted than drug-naïve cells, leading to accumulation of resistance mutations (Russo *et al*,  
73 2019; Shaffer *et al*, 2017; Schuh *et al*, 2020).

74 A paradox of the drug adapted state in BRAF<sup>V600E</sup> mutant melanoma is that MAPK activity is known to  
75 be essential for proliferation of this cell type and yet oncogenic BRAF signaling remains strongly  
76 inhibited. Analysis of cell-average MAPK levels led to the suggestion that partial MAPK rebound (to ~5%  
77 to 20% of the kinase activity in drug-naïve cells) is sufficient for cell survival and proliferation (Lito *et al*  
78 *et al*, 2012). However, more recent single-cell studies show that adapted cells experience sporadic MAPK  
79 pulses of ~90 min duration and that these pulses are sufficient for cyclin D transcription and passage of a  
80 subset of cells into S phase (Gerosa *et al*, 2020). Pulses appear to arise from growth factors that act in an  
81 autocrine/paracrine manner by binding to EGFR and other RTKs expressed on persister cells. This finding  
82 raises a further question: how precisely can oncogenic MAPK signaling be repressed while receptor-  
83 mediated MAPK signaling remains active? The accepted explanation is that the cell signaling has become  
84 “rewired” in adapted cells (Ding *et al*, 2018; Lee *et al*, 2012; Wei *et al*, 2020).

85 In the absence of a new mutation, rewired networks are postulated to transmit or propagate oncogenic  
86 signals by different combinations or activity states of cell signaling proteins than drug-naïve networks. In  
87 some cases, rewiring is thought to involve a switch from one mitogenic pathway to another, from MAPK  
88 to PI3K-AKT signaling for example, but in drug resistant melanoma, the same MAPK components appear  
89 to be essential in the original and rewired states. More generally, rewiring is one of several concepts in  
90 translational cancer biology that are intuitively plausible but have not yet been subjected to quantitative,  
91 mechanistic modeling and analysis.

92 One way to gain deeper insight into rewiring at a mechanistic level is to perform the type of dynamical  
93 systems analysis that has previously proven effective in the study of RTK-MAPK signaling (Kholodenko  
94 *et al*, 1999; Rukhlenko *et al*, 2018; Kholodenko, 2015; Chen *et al*, 2009; Schöberl *et al*, 2009). This  
95 commonly involves constructing networks of ordinary differential equation (ODEs) to represent the  
96 precise temporal evolution of signal transduction networks under different conditions. ODEs are a  
97 principled way to represent cellular biochemistry in a continuum approximation and, with the addition of

98 “compartments”, can also model the assembly of multi-protein complexes and transport between cellular  
99 compartments (Aldridge *et al*, 2006). In the case of the A375 melanoma cells used in this study,  
100 quantitative proteomics shows that proteins in the MAPK pathway are present at  $10^2$  to  $10^4$  molecules per  
101 cell (Gerosa *et al*, 2020), so continuum mass-action models represent an appropriate approximation  
102 (conversely, intrinsic noise is expected to be low).

103 Combinatorial complexity represents a substantial challenge to modeling even relatively restricted sets of  
104 signaling proteins. The presence of multiple reversible, post-translational modifications, protein-protein,  
105 and protein-small molecule interactions often makes the number of distinct biochemical species 10-1000  
106 fold greater than the number of gene products (Faeder *et al*, 2005) (**Box 2**). Rule-based modeling was  
107 developed specifically to address this challenge and uses abstract representations of binding patterns and  
108 reactions to describe combinatorically complex networks in a compact programmatic formalism. Rules  
109 automatically generate ODE networks describing diverse types of reactions and molecular assemblies  
110 (Faeder *et al*, 2005; Hlavacek *et al*, 2006; Lopez *et al*, 2013) for subsequent model calibration and  
111 exploration.

112 An additional challenge in modeling MAPK signaling is that it involves allosteric regulation, in which the  
113 affinities of RAS, RAF and small molecules for each other are determined by protein conformation and  
114 oligomerization state. In conventional ODE modeling, a large number of parameters are necessary to  
115 describe the dependency of such affinities on states of assembly. However, protein-protein and protein-  
116 small molecule binding and unbinding does not consume energy and thermodynamic formalisms that  
117 impose energy conservation provide powerful means to constrain the number of binding parameters to a  
118 minimal, principled set (**Box 3**) (Ollivier *et al*, 2010; Sekar *et al*, 2016). The use of thermodynamics to  
119 derive kinetic rates was pioneered by Arrhenius (Arrhenius, 1889) and subsequently derived  
120 independently by Eyring, (Eyring, 1935), Evans and Polanyi (Evans & Polanyi, 1935), but it is only  
121 recently that practical approaches have emerged for using thermodynamic formalisms in reaction models  
122 (Gawthrop & Crampin, 2017; Honorato-Zimmer *et al*, 2015; Kholodenko, 2015; Klosin *et al*, 2020;  
123 Mason & Covert, 2018; Olivier *et al*, 2005; Rukhlenko *et al*, 2018; Gollub *et al*, 2021). Applications of  
124 these methods to signal transduction remain limited, in part because of the complexity of relevant models,  
125 but Kholodenko and colleagues have pioneered the application of thermodynamic balance to MAPK  
126 signaling (Rukhlenko *et al*, 2018).

127 Model calibration and non-identifiability represents a final challenge in modeling networks of readily  
128 reversible reactions. Model calibration (estimating parameter values that minimize the deviation from

129 experimental data) is compute-intensive (Fröhlich *et al*, 2017) and even after calibration, parameters can  
130 assume wide ranges, a property known as non-identifiability (Kreutz *et al*, 2012; Raue *et al*, 2011; Kreutz  
131 *et al*, 2012; Chis *et al*, 2011; Wieland *et al*, 2021). When models are combinatorically complex and non-  
132 identifiable it can be difficult to quantify fluxes, explain how signaling state arise and trace how species  
133 of interest are created by upstream reactions and consumed downstream. This complicates the  
134 quantification of signal propagation through the reaction network, a prerequisite for the investigation of  
135 concepts of such as network rewiring.

136 In this paper we described a second-generation MAPK Adaptive Resistance Model (**MARM2.0**) that  
137 seeks to explain the rewiring of EGFR/MAPK signaling occurring in drug adapted BRAF<sup>V600E</sup> melanoma  
138 cells. MARM2.0 builds on a large body of structural, biochemical and theoretical work on EFGR/MAPK  
139 signaling and feedback regulation (Haling *et al*, 2014; Hatzivassiliou *et al*, 2013; Lito *et al*, 2012, 2013;  
140 Poulidakos *et al*, 2010; Solit *et al*, 2006; Yao *et al*, 2015) and is constructed using rule-based modeling in  
141 PySB with thermodynamic balance. By developing a new approach to causal tracing, we show how  
142 rewiring alters the organization and amplification/attenuation characteristics of multiple reaction channels  
143 operating in parallel in the MAPK cascade. We find that, in addition to the well-known differential  
144 sensitivity of oncogenic RAF monomers and wild-type dimers to RAFi, there exists a similar, less  
145 characterized differential sensitivity of MEK to MEKi based on whether the signal arises from BRAF<sup>V600E</sup>  
146 or wild-type RAF. Together with a time-scale separation between signal transduction and transcriptional  
147 feedback, this generates a drug adapted state in which BRAF<sup>V600E</sup> is inhibited but a MAPK cascade  
148 involving many of the same components can be activated by RTK ligands or mutation of proteins such as  
149 NRAS.

## 150 **RESULTS - TEXT BOXES 1 TO 3**

### 151 **Box 1. The MAPK signaling pathway.**

152 The core of the MAPK pathway is a three-enzyme cascade comprising RAF-MEK-ERK kinases (HUGO:  
153 ARAF/BRAF/RAF1, MAP2K1/MAP2K2, and MAPK1/MAPK3) that transduces signals from  
154 extracellular stimuli, most commonly growth factors and receptor tyrosine kinases (RTKs) (Lavoie *et al*,  
155 2020). Three-enzyme cascades involving closely related kinases also transmit signals from cytokines and  
156 their receptors. Driving oncogenic mutations are found in multiple components in or upstream of the  
157 MAPK pathway (Burotto *et al*, 2014), commonly KRAS (G12C/D/V, G13C/D), NRAS (Q61H/K)(Prior  
158 *et al*, 2012), BRAF (V600E/K) and less commonly MEK and ERK (Gao *et al*, 2018). BRAF<sup>V600E</sup> or  
159 closely related mutations (e.g., BRAF<sup>V600K</sup>) are found in ~50% of cutaneous melanomas and RAF/MEK

160 therapy is the first line treatment option for BRAF-mutant metastatic melanoma (Flaherty *et al*, 2012).  
161 BRAF mutations are also found in ~10% of colorectal cancers and several other tumor types (Davies *et*  
162 *al*, 2002), but RAF/MEK therapy is rarely effective in these settings.

163 Binding of growth factors to RTKs induces their intracellular auto-phosphorylation, followed by  
164 association of SH2 and SH3-containing proteins with phosphorylated tyrosine residues on receptor tails.  
165 Subsequent signalosome assembly involves adaptor proteins such as GRB2, enzymes that modify second  
166 messengers such as PI3Ks, and guanine nucleotide exchange factors (GEFs) such as SOS1 (Lemmon &  
167 Schlessinger, 2010). GEFs convert one or more of the N, K, and H RAS GTPases (depending on cell type)  
168 into the active GTP-bound form, and GTP-bound RAS then activates the ARAF/BRAF/RAF1 kinases by  
169 recruiting them to the plasma membrane and inducing their dimerization. BRAF/RAF1 homo- and  
170 heterodimers are the primary mediators of MEK phosphorylation (ARAF has low kinase activity).  
171 Phosphorylated and active MEK then phosphorylates ERK on two proximate residues. Both  
172 phosphorylation steps are potentiated by the assembly of multi-protein complexes involving 14-3-3 and  
173 KSR scaffolding proteins (Lavoie & Therrien, 2015). Active ERK phosphorylates transcription factors,  
174 cytoskeletal proteins, and other kinases and is the proximate functional output of the MAPK cascade.  
175 Changes in the levels or activities of proteins such as DUSP4/6 phosphatases, which remove activating  
176 phosphorylation modifications, and SPRY2/4 proteins, which sequester GRB2, as well as inhibitory  
177 phosphorylation of EGFR, SOS1 and CRAF act as negative-feedback mechanisms and enforce  
178 homeostatic control over MAPK activity.

179

## 180 **Box 2. Drugs targeting MAPK kinases.**

181 Multiple small molecule inhibitors targeting individual MAPK kinases are FDA approved but  
182 combinations of RAF and MEK inhibitors are the most widely used clinically. A subtle relationship exists  
183 between the mechanism of action of these drugs, kinase conformation, and formation of multi-protein  
184 complexes. In the absence of upstream stimuli, RAF kinases are present in cells as monomers but  
185 activation by RAS-GTP causes dimerization. Some activating BRAF mutations (Yao *et al*, 2015) and  
186 splice variants (Poulikakos *et al*, 2011) also promote dimerization, but BRAF<sup>V600E/K</sup> kinases are  
187 constitutively activated without requiring dimerization. Whether RAF is present in monomer, heterodimer  
188 or homodimer forms profoundly influences the enzyme's sensitivity to inhibition (Yao *et al*, 2015). The  
189 FDA approved RAF inhibitors vemurafenib, dabrafenib, and encorafenib are ATP-competitive type I½  
190 kinase inhibitors (Roskoski, 2016) that preferentially bind to the alpha-C helix-out, DFG-in conformation  
191 assumed by BRAF<sup>V600E/K</sup>; this state differs from the alpha-C helix-in (and DFG-in) state found in activated



192 wild-type RAF (Karoulia *et al*, 2017). Whereas binding of type I½ BRAF inhibitors to BRAF<sup>V600E/K</sup> is  
193 inhibitory, binding to wild type RAF monomers promotes kinase dimerization and activation, leading to  
194 amplification of MAPK signaling, a phenomenon termed paradoxical activation (Hall-Jackson *et al*, 1999;  
195 Poulidakos *et al*, 2010; Hatzivassiliou *et al*, 2010). To prevent this, “paradox breaker” RAF inhibitors  
196 such as PLX8394 have been developed (Tutuka *et al*, 2017; Yao *et al*, 2019; Zhang *et al*, 2015). These  
197 are type I½ inhibitors that, by virtue of locking the R506 side-chain in the out conformation, do not  
198 promote dimerization (Karoulia *et al*, 2017). Both regular and paradox breaker type I½ inhibitors have a  
199 lower affinity for the 2nd protomer in a RAF dimer, which typically assumes the inactive alpha-C helix-  
200 in, DFG-out conformation. Thus, the structural differences between monomers and dimers (rather than  
201 differences in the ATP binding pocket) are the basis of the selectivity of clinically approved RAF  
202 inhibitors for cells transformed by BRAF mutant kinases. However, the inability of type I½ inhibitors to  
203 fully inhibit homo- and hetero-dimer RAF kinases is also a primary mechanism of drug resistance in  
204 cancers with sustained RAS-GTP signaling; one well established example is EGFR-driven signaling in  
205 BRAF<sup>V600E/K</sup> colorectal cancer. In contrast, so-called “panRAF” Type II inhibitors, such as the Phase 1  
206 compound LY3009120 (Peng *et al*, 2015) and preclinical compound AZ-628 (Noeparast *et al*, 2018), bind  
207 RAF in the alpha-C helix-in, DFG-out conformation and can, thus, bind both RAF protomers with similar  
208 potency. These inhibitors can achieve more complete MAPK suppression but appear to cause additional  
209 toxicity, presumably by interfering with MAPK activity in non-cancer cells. Multiple type II inhibitors  
210 are currently under clinical investigation for solid tumors (Yen *et al*, 2021), including melanoma, but, so  
211 far, none have been approved for use in humans.

212 FDA approved MEK inhibitors such as cobimetinib, trametinib and binimetinib, are type III non-ATP  
213 competitive (allosteric) inhibitors that lock the MEK kinase in a catalytically inactive state, limit  
214 movement of the activation loop, and decrease phosphorylation by RAF (Wu & Park, 2015). These MEK  
215 inhibitors are more potent at preventing ERK activation by BRAF<sup>V600E/K</sup> than by RAF acting downstream  
216 of mutant RAS (Lito *et al*, 2014; Hatzivassiliou *et al*, 2013) or RTKs (Gerosa *et al*, 2020). The reasons  
217 for this are not fully understood but are thought to include the lower affinity of MEK inhibitors for  
218 phosphorylated as compared to unphosphorylated MEK and differences in RAF-MEK binding  
219 (Hatzivassiliou *et al*, 2013; Pino *et al*, 2021).

220



### 221 **Box 3. Thermodynamic description of conformational states in rule-based modelling.**

222 Changes in protein assembly and conformation, often mediated by post-translational modification, are the  
223 structural basis for much of signal transduction. For example, generating the active conformation of  
224 CRAF requires both N-terminal phosphorylation and association with a second RAF family member to  
225 stabilize the active state. Because formation of protein-protein interactions does not consume energy, a  
226 strict relationship exists between conformation and binding affinity (Tsai & Nussinov, 2014): when  
227 binding increases the stability of a specific conformational state, that state will also have higher binding  
228 affinity for its interacting partner. Since this relationship is transitive, binding affinities can be coupled  
229 through conformational states, giving rise to long-range, higher-order dependencies in oligomeric  
230 complexes. Such higher-order dependencies can create ultrasensitive responses, which are often involved  
231 in cell fate decisions or homeostasis.

232 A conformational state is defined by a specific local minimum in the Gibbs free energy landscape. The  
233 relative stability of a conformational state  $S$  can be expressed as free energy difference  $\Delta G_c$  with respect  
234 to a reference state  $S_0$ . Stabilizing or destabilizing conformational states is equivalent to changes in this  
235 free energy difference (i.e.,  $\Delta \Delta G_c$ ). Similarly, binding reactions can be characterized by the difference  
236  $\Delta G_b$  between the Gibbs free energies of binding educts and binding products, which is proportional to the  
237 logarithm of their dissociation constant  $K$ :  $\Delta G_b = -RT \log(K)$ , where  $R$  is the gas constant and  $T$  is the  
238 temperature. Energy conservation guarantees that a ligand (L)-induced changes to the free energy of a  
239 conformational state  $S$  ( $\Delta \Delta G_c$ ) is equal to the difference  $\Delta \Delta G_b$  in the affinity of L for  $S$  as compared to  $S_0$ .  
240 This equilibrium description can be extended to dynamic behavior by means of the Arrhenius Equation  
241 (Arrhenius, 1889), which defines reaction propensities according to the free energy of the transition state  
242 (Sekar *et al*, 2016). Such an energy-based formulation enforces Wegscheider-Lewis cycle conditions  
243 on kinetic parameters (Wegscheider, 1911), ensuring detailed balance for equilibrium states, but also  
244 constraining dynamics of non-equilibrium processes. By ensuring energy conservation, the effective  
245 number of parameters needed to describe multimeric oligomerization processes is reduced  
246 (Kholodenko, 2015) and powerful constraints are placed on the structures of models describing species  
247 that adopt multiple conformational states.

248 Energy conservation provides a natural framework for the specification of structure-based kinetic models  
249 that include allosteric interactions (Rukhlenko *et al*, 2018) and has been incorporated into a rule-based  
250 modeling form as energy-BioNetGen (eBNG)(Sekar *et al*, 2016). In eBNG, allosteric interactions are  
251 encoded using energy patterns that permit specification of  $\Delta \Delta G_b$ . For example, a kinetic model for the

252 binding of RAF inhibitors (RAF<sub>i</sub> in text, I in figure) to RAF kinases (RAF in text, R in figure) (**Figure**  
253 **Box 1A**) can be constructed using one rule for RAF dimerization (turquoise) and another for drug binding  
254 to RAF (black), which generates 12 reversible reactions (**Figure Box 1B**). Allosterism for drug binding to  
255 the 1<sup>st</sup> or 2<sup>nd</sup> protomer of a RAF dimer is imposed using the thermodynamic factors  $f$  (orange) and  $g$   
256 (purple), which change  $\Delta\Delta G_b$  via two energy patterns. The contribution of these thermodynamic factors  
257 to kinetic rates is exemplified by the relationship between Gibbs free energies and rate constants for RAF  
258 dimerization that are RAF<sub>i</sub>-dependent (**Figure Box 1C**; no RAF<sub>i</sub>, black; one RAF<sub>i</sub>, orange; two RAF<sub>i</sub>  
259 purple). The parameter  $\phi$ , controls whether  $\Delta\Delta G_b$  influences educt states ( $\phi = 0$ ) or product states ( $\phi = 1$ ,  
260 depicted in C) or a mixture ( $0 < \phi < 1$ ). Using PySB, all 12 reactions depicted in **Figure Box 1B** can be  
261 specified using two rules and four energy-patterns (**Figure Box 1D**). Thus, PySB code automatically  
262 generates symbolic reaction rates that parameterize the reaction network according to allosteric effects  
263 whose magnitudes are set by the thermodynamic factors  $f$  and  $g$  (**Figure Box 1E**). In this way, models of  
264 complex drug-protein interactions, such as resistance mediated by formation of RAF dimers, can be easily  
265 parameterized in terms of the baseline equilibrium constant for RAF dimerization ( $K_{RR}$ ). We illustrated  
266 this by simulations with  $f=0.001$  and  $g=1000$  (**Figure Box 1F**) which represent a type I $\frac{1}{2}$  RAF inhibitor  
267 that avidly binds the 1<sup>st</sup> RAF protomer but has a 10<sup>6</sup>-fold lower affinity for the 2<sup>nd</sup> protomer in a RAF  
268 dimer.

## 269 MAIN RESULTS

### 270 A Structure-Based Model of EGFR and ERK Signaling

271 The MAPK signaling cascade (**Box 1**) and its immediate regulators constitute no more than two dozen  
272 unique gene products, but the binding of these proteins to each other gives rise to a remarkably large  
273 number of molecular species, many of which have distinct activities. Moreover, the complexity of the  
274 MAPK cascade increases substantially when we consider states that are bound and unbound to drugs. For  
275 example, BRAF/CRAF can exist in monomeric, homo- and heterodimeric forms, with either one or two  
276 subunits bound to RAF<sub>i</sub>, each with or without RAS-GTP bound as an activator. Drug binding occurs  
277 preferentially to some BRAF oligomers and not others (**Box 2**), and can strongly influence association  
278 with upstream and downstream factors. To recapitulate the responses of cells to RAF<sub>i</sub> in a mechanistic  
279 computational model, it is necessary for the allosteric interactions that control association of RAS, RAF  
280 and RAF<sub>i</sub> to be described in detail (Rukhlenko *et al*, 2018).

281 To accomplish this, we generated a compartmentalized ODE model of MAPK signaling (the MAPK  
282 Adaptive Resistance Model MARM2.0) that extends a related model (MARM1.0) used in an experimental

283 study we recently published (Gerosa *et al*, 2020) that uses modeling as an explanatory tool but does not  
284 involve any model analysis. Such analysis is the focus of the current paper and its updated model.  
285 MARM2.0 was calibrated using data described in Gerosa *et al*. with the addition of drug-response data  
286 that is unique to the current study. Moreover, both MARM1.0 and MARM2.0 build on an earlier model  
287 of RAF-RAFi interaction developed by Kholodenko (Kholodenko, 2015), but with the inclusion of more  
288 proteins and complexes. Model expansion was greatly facilitated by the use of rule-based BNG models in  
289 the domain-specific Python language PySB (Blinov *et al*, 2004; Lopez *et al*, 2013). More specifically,  
290 MARM1.0 & 2.0 extend the RAF-MEK-ERK model of Kholodenko with the addition of upstream  
291 activation and multiple feedback mechanisms relevant to acquired resistance to RAF inhibitors (Lito *et*  
292 *al*, 2012) and a more detailed description of MAPK enzymes (**Figure 1A**). Compared to MARM1.0,  
293 MARM2.0 is compartmentalized (compartments: *extracellular space*, *plasma membrane*, *cytoplasm* and  
294 *endosomal membrane*), it adds EGFR-CBL interaction and endosomal recycling, and includes mRNA  
295 species in the description of transcriptional feedback control. In total, MARM2.0 involves 17 distinct  
296 molecular species: eleven proteins, three mRNA species and three small molecule inhibitor classes.  
297 Proteins include EGFR, BRAF, CRAF, MEK and ERK, the dual specificity phosphatase DUSP, guanine  
298 nucleotide exchange factor SOS1, GTPase RAS, E3 ubiquitin ligase CBL, adaptor protein GRB2, and  
299 RTK negative regulator SPRY (ellipses in **Figure 1A**). RAFi, panRAFi and MEKi, (depicted as colored  
300 circles and rounded boxes in **Figure 1A**) are optionally present and values for kinetic and energetic  
301 parameters can be set so that the inhibitors can correspond to any of ten different small molecules that are  
302 used as human therapeutics or pre-clinical tools. These comprise the RAFi compounds vemurafenib,  
303 dabrafenib, PLX8394, the panRAFi compounds LY3009120 and AZ628, and MEKi compounds  
304 cobimetinib, trametinib, selumetinib, binimetinib and PD0325901.

305 To maintain model tractability we lumped together paralogs, combined phosphorylation sites having  
306 similar functions, and simplified other aspects of EFGR regulation, which exhibits particularly high  
307 combinatorial complexity (Blinov *et al*, 2006). MARM2.0 nonetheless has over 15,000 biochemical  
308 reactions, illustrating how transient binding among a few kinases, their regulators, and inhibitory drugs  
309 generates an elaborate biochemical network. With respect to paralogs, we made the following  
310 assumptions: “RAS” stands in for KRAS, NRAS, and HRAS, “MEK” for MAP2K1 and MAP2K2, “ERK”  
311 for MAPK1 and MAPK3, “DUSP” for DUSP4 and DUSP6, and “SPRY” for SPRY2 and SPRY4 (lumping  
312 of paralogs is depicted in **Figure 1A** by thick outlines). This is equivalent to assuming that all paralogs  
313 have the same kinetic rate constants. In some cases, paralogs are known to be very similar (e.g., MAPK1,  
314 MAPK3) but in other cases they are functionally distinct (e.g, KRAS, NRAS and HRAS). The three RAS

315 paralogs are expressed at similar levels in A375 and we did not distinguish among them because we do  
316 not yet have relevant training data. However, MARM could easily be modified for future studies that focus  
317 on differences between RAS species. We did not lump BRAF and CRAF into a single RAF species due  
318 to the unique role that BRAF<sup>V600E</sup> plays as an oncogene; ARAF was omitted due to its low kinase activity.  
319 We also lumped together multi-site phosphorylation of EGFR (on Y1068, Y1086, Y1173, etc.), MEK  
320 (MAP2K1: S218, S222; MAP2K: S222, S226) and ERK (MAPK1: T185, Y187; MAPK3: T202, Y204)  
321 as single post translational modifications for each protein. The underlying phosphorylation reactions were  
322 implemented as two-step reactions comprising substrate binding and phosphorylation steps. Finally,  
323 mRNA species were included for DUSP, EGFR and SPRY to model transcriptional feedback with distinct,  
324 lumped translation rates for each species (depicted by dark green arrows in **Figure 1A**). This made it  
325 possible to calibrate models on time-course and dose-response transcriptomic data.

326 To model RTK-induced MAPK activation we focused on EGFR autophosphorylation at Y1068, Y1086  
327 and Y1173, which creates GRB2 binding sites (Batzer *et al*, 1994) as well as EGFR ubiquitination by  
328 CBL (Alwan *et al*, 2003) and subsequent endocytosis and recycling. EGFR endocytosis and recycling  
329 rates were dependent on EGFR levels, as previously described (Starbuck & Lauffenburger, 1992; Resat  
330 *et al*, 2003). The “addition” of EGF to MARM2.0 promotes EGFR dimerization and trans-  
331 phosphorylation, recruitment of GRB2:SOS1 complexes to phospho-tyrosine residues on receptor tails  
332 and consequent GTP loading and activation of RAS. Receptors are then subjected to endocytosis leading  
333 to either their degradation or recycling. GTP-loaded RAS (RAS-GTP) promotes RAF dimerization and  
334 initiates the RAF-MEK-ERK (MAPK) cascade (**Box 2**). When BRAF<sup>V600E</sup> is present, it constitutively  
335 phosphorylates MEK in the absence of upstream signals. Phosphorylated MEK (pMEK) phosphorylates  
336 ERK (pERK), which indirectly upregulates expression of proteins that act as negative regulators of RTK  
337 signal transduction (these intermediate steps are represented as lumped reactions). Multiple negative  
338 regulatory mechanisms are known and we modelled four of them. Three involved transcriptionally-  
339 mediated changes in protein abundance for (i) EGFR itself, (ii) DUSP, which antagonize ERK signaling  
340 by dephosphorylating the T and Y residues in the T-Y-X motif in the ERK activation loop (Saha *et al*,  
341 2012; Corbalan-Garcia *et al*, 1996) and (iii) SPRY, which has multiple biochemical activities, among  
342 which we modeled sequestration and inactivation of GRB2 (Lao *et al*, 2006, 2). We also modeled the  
343 phosphorylation-dependent inhibition of SOS1 binding to GRB2 and acquisition of a 14-3-3 docking site,  
344 which sequesters the protein in an inactive conformation (Corbalan-Garcia *et al*, 1996; Kamioka *et al*,  
345 2010). SOS1 is phosphorylated on S1134 and S1161 sites by RSK, which is transcriptionally and post-

346 translationally activated by ERK, but we represented this with a single pERK dependent phosphorylation  
347 reaction.

348 MARM 2.0 includes 66 rules and 85 free parameters (kinetic rates, energies, scaling factors, etc.; total  
349 109 free parameters when instantiating MARM2.0 for all of the 10 small molecules). Six rules described  
350 transcript turnover, 7 protein turnover, 22 phosphorylation, 25 binding and 3 sets of 2 rules each described  
351 GTP/GDP exchange, ubiquitination, and translocation between cellular compartments (**Figure 1C**). For  
352 example, the binding rule “*Rule('BRAf\_and\_uMEK\_bind\_and\_dissociate', BRAf(mek=None) +*  
353 *MEK(phospho='u', raf=None) | BRAf(mek=1) % MEK(phospho='u', raf=1), ...)*” describes binding of  
354 BRAF to unphosphorylated MEK (uMEK), a prerequisite for MEK phosphorylation. Binding requires  
355 MEK to be unphosphorylated (*phospho='u'*), but does not specify any dependence on RAS, BRAF, CRAF  
356 or RAFi. Implementation of PySB rules generated >2,200 molecular species and >30,000 biochemical  
357 reactions with most proteins participating in >1000 species, a reflection of the combinatorial complexity  
358 described above. Binding rules accounted for >85% of all reactions in the model (25,922 of 30,384  
359 reactions total) and > 75% (19/25) of these binding rules were formulated as “energetic rules” with binding  
360 affinities expressed in terms of normalized Gibbs free energy differences ( $\Delta G$ ; **Box 3**). Binding and  
361 unbinding rates were then computed according to the Arrhenius law. To facilitate programmatic model  
362 formulation within an energetic framework, we implemented support for the eBNG framework (Hogg,  
363 2013; Harris *et al*, 2016) in PySB. This enabled specification of allosteric interactions using differences  
364 in free energy differences ( $\Delta\Delta G$ , **Box3**), which is a principled way of establishing context dependent  
365 binding and unbinding rates (with the balance encoded by the parameter  $\phi$ ).

### 366 **ODE Description of ERK Pulsing Enabled Use of Population Average and Perturbational** 367 **Experiments to Describe the Behavior of Single Cells**

368 Imaging studies have established that the A375 BRAF<sup>V600E</sup> melanoma cell line used in this study enters a  
369 seemingly steady-state drug-adapted condition within 24 hours of exposure to RAFi and/or MEKi (Gerosa  
370 *et al*, 2020). Data were therefore collected at this time point or subsequently, and model simulations  
371 included a pre-equilibration step. Once adapted to RAFi, BRAF<sup>V600E</sup> melanoma cells experience transient  
372 pulses of ERK activity at irregular intervals, consistent with a stochastic regulatory mechanism (Gerosa  
373 *et al*, 2020). In principle, BNG/PySB models can be instantiated as stochastic, agent-based systems to  
374 represent such stochastic fluctuations (Sneddon *et al*, 2011). However, the reactions in MARM2.0 involve  
375 sufficiently abundant proteins ( $\sim 10^2$  to  $10^6$  copies per cell) that intrinsic stochasticity is not expected to  
376 arise spontaneously. Thus, the irregular pulsing by drug adapted A375 cells appears to originate not in the



377 noise of intracellular reactions, but instead in the spatially restricted release of growth factors acting in an  
378 autocrine and paracrine manner (Gerosa *et al*, 2020). In the absence of better understanding of these  
379 extracellular processes, they are difficult to represent computationally. Moreover, calibration of stochastic  
380 models is substantially more difficult than for deterministic models (Fröhlich *et al*, 2016).

381 Fortunately, experiments showed that addition of any of several different exogenous growth factors to  
382 RAFi- or MEKi-adapted cells generates synchronous ERK pulses having the same dynamics and drug  
383 sensitivities as asynchronous pulses arising spontaneously (Gerosa *et al*, 2020). Because single cells are  
384 much more similar to each other during ligand-induced than spontaneous pulsing, induced pulses are more  
385 amenable to characterization using standard transcriptional profiling and protein mass spectrometry  
386 methods. A further advantage is that synchronous pulses can be modeled at the population level by an  
387 ODE-model that is a reasonable simulacrum of single cell biology. In the current work, we used data from  
388 pulses generated by growth factors to provide insight into spontaneous pulses; as a consequence, we  
389 focused only on mechanisms downstream of receptor activation. Future work will be required to  
390 understand the origins and spatial distributions of ligands in the micro-environment of drug adapted cells  
391 undergoing asynchronous and spontaneous pulsing.

392 To further constrain MARM2.0, we used targeted proteomics with calibration peptides to measure the  
393 absolute abundances of all 11 protein species and two phospho-proteins; data were collected at five  
394 vemurafenib concentrations yielding 55 data points for model calibration. In addition, we extracted  
395 relative abundances for 3 mRNA species from genome-wide transcript profiling performed at 8  
396 vemurafenib concentrations and 7 timepoints following EGF stimulation (yielding 45 calibration data  
397 points). Immunofluorescence imaging of pERK and pMEK provided the greatest amount of data (847 data  
398 points) and involved 234 different experimental conditions each involving a different concentration of one  
399 or more of the following perturbations: EGF, RAFi, panRAFi or MEKi. Imaging data had single cell  
400 resolution but population averages were used for model calibration, since we aimed to model the behavior  
401 of an average single cell. Training data was complimented with 2,209 immunofluorescence data points in  
402 1,647 conditions for model validation, which are described in greater detail below.

### 403 **Rule-Based Modeling enables Efficient Calibration through Multi-Model Optimization**

404 To calibrate MARM2.0 on experimental data, we used gradient-based numerical optimization, which  
405 performs well for large models (Villaverde *et al*, 2019). Optimization is nonetheless challenging for a  
406 model with as many reactions as MARM2.0: weighted least squares minimization of an objective function  
407 required simulation for each of the 234 training conditions for every evaluation of the objective function,

408 and this took minutes to perform. Optimization required hundreds of evaluations of the objective function  
409 and its derivatives, resulting in calibration runtimes on the order of weeks to months even on a cluster  
410 computer. However, we found that, by exploiting patterns in the perturbational data it was possible to  
411 substantially reduce the number of species in a condition-specific manner, accelerating calibration  
412 (Fröhlich *et al*, 2019; Städter *et al*, 2021). In our calibration dataset, 122 conditions involved one  
413 perturbation (RAFi, panRAFi or MEKi individually), 111 conditions involved two perturbations (RAFi  
414 or MEKi followed by addition of EGF) and only one involved no perturbation, (**Figure 1D**, top). In the  
415 absence of a perturbing agent, all model species involving that agent (e.g., RAF bound to RAFi, **Figure**  
416 **1B**) as well as a subset of downstream species (e.g., pEGFR activated by EGF) have zero concentrations  
417 and need not be modelled. To automatically generate, compile and track sub-models omitting zero  
418 concentration species for a diverse range of perturbations, we created routines that exploited the  
419 programmatic features of PySB (Lopez *et al*, 2013) and BNGL network generation (Blinov *et al*, 2004)  
420 (see MultiModelFitting in Material and Methods). This yielded models having an average of 1.5 times  
421 fewer parameters than MARM2.0 itself (55-83 parameters compared to 85) (**Figure 1D**, middle) and up  
422 to 45-fold fewer species (50-1253 species compared to 2284) (**Figure 1D**, bottom). Multi-model objective  
423 calibration was performed using pyPESTO (a python reimplementation of the Parameter EStimation  
424 Toolbox; (Stapor *et al*, 2018)) allowing consistent generation of a full model based on calibration of sub-  
425 models; this is an exact approach that does not reduce the accuracy of the objective function or gradient  
426 evaluation. Overall, we found that using PySB to match model structure to data structure reduced median  
427 gradient evaluation time ~3-fold (from 5h to 1.60h on a single compute core; **Figure 1F**), which for  
428 MARM2.0 extrapolated to a reduction of ~2 weeks in wall-time and ~38 years in CPU time (using  $10^3$   
429 cores with 5 days wall-time). Since multiple rounds of model refinement and calibration were necessary  
430 over the course of the current work, a three-fold improvement in calibration time had a major impact. We  
431 expect that multi-model objective calibration will be broadly useful with other models involving  
432 perturbational datasets.

433 Following calibration, MARM2.0 quantitatively captured the effects of RAFi and MEKi treatment on  
434 baseline pERK levels in the drug adapted state and during transient EGF stimulation. Relatively few  
435 parameters converged on unique values (**Figure S1**) due to the known non-identifiability of biochemical  
436 models having explicit forward and back reactions, (Gutenkunst *et al*, 2007) as well as incomplete  
437 convergence of the optimizer due to limitations in the computational budget. We therefore used parameter  
438 sets from the 5% of optimization runs having the lowest value of the objective function (50 parameter  
439 sets) to generate a set of dynamical trajectories that estimated the impact of parametric uncertainty on



440 simulations. For the great majority of data points (87.4%) we found that 80% of simulated trajectories fell  
441 within experimental error bounds (**Figure 2, S2**), demonstrating good agreement between the calibrated  
442 model with experimental data. This does not constitute a rigorous quantification of parameter uncertainty  
443 (Fröhlich *et al*, 2014), but does account for correlation in parameter values (Eydgahi *et al*, 2013) and was  
444 the only practically applicable approach given the number of parameters and species in MARM2.0.

#### 445 **Causal Decomposition untangles Intertwined BRAF<sup>V600E</sup> and RAS Driven Signaling**

446 When cells were adapted to RAFi (vemurafenib unless otherwise noted) for 24 hours, steady-state pERK  
447 levels decreased with drug concentrations. In striking contrast, the amplitude of pERK pulses generated  
448 by adding exogenous EGF increased with RAFi concentration (**Figure 2A** left). Thus, EGF (and other  
449 growth factors applied in a similar manner) induced pERK in proportion to the degree of BRAF<sup>V600E</sup>  
450 inhibition. When MEKi (cobimetinib unless otherwise noted) was used over a dose range, a biphasic  
451 response was observed: below ~0.1  $\mu\text{M}$  MEKi EGF-induced pERK levels increased with MEKi  
452 concentration but above ~0.1  $\mu\text{M}$  MEKi they fell (**Figure 2A** right). In all cases, the effects of EGF were  
453 transient and pERK levels returned to their drug-adapted baseline levels within one to two hours. The  
454 calibrated MARM2.0 model recapitulated all of these phenomena and we therefore sought a molecular  
455 explanation using model analysis.

456 Experimentally determined pMEK and pERK levels measure the sum of active MAPK kinases generated  
457 by oncogenic and chronically active BRAF<sup>V600E</sup> and by transiently active EGFR (**Figure 2B**). To  
458 decompose these two sources of MAPK activity, we modeled a “RAS reaction channel,” which  
459 encompasses all reactions initiated by (RAS-GTP)<sub>2</sub>-RAF<sub>2</sub> oligomers, and a “BRAF<sup>V600E</sup> reaction channel”  
460 encompassing all MAPK reactions downstream of the BRAF oncogene. In agent-based modeling, it is  
461 straightforward to keep track of the different origins of a single molecular species and thereby generate  
462 causal traces or “stories” (Boutillier *et al*, 2018). To adapt this approach to an ODE model, we used an *in*  
463 *silico* labeling strategy that involved adding a virtual “tag” to pMEK (**Figure 2C**, Methods Section Causal  
464 Signal Decomposition) at the time of its generation by (RAS-GTP)<sub>2</sub>-RAF<sub>2</sub> (orange, top left panel) or  
465 BRAF<sup>V600E</sup> (blue, bottom left panel). The tag was copied from pMEK to pERK upon ERK activation  
466 (blue/orange, top right panel) and removed during dephosphorylation (blue/orange, bottom right panel).  
467 Implementing this approach required modification of only of a few PySB rules (**Figure 2D**) and did not  
468 change model dynamics.

469 For causal decomposition of MARM2.0 under a range of conditions, computational labeling of both  
470 pMEK and pERK was necessary, since the two active forms do not have the same proportionality (degree

471 of amplification) in the two reaction channels: in the BRAF<sup>V600E</sup> channel, the MEK phosphorylation rate  
472 is lower when MEKi is bound to uMEK, generating a lower ratio of pMEK-MEKi to *apo*-pMEK than in  
473 the RAS channel, in which the MEK phosphorylation rate is independent of MEKi binding. The origins  
474 of this phenomenon are described in greater detail below. Since MEKi inhibits the catalytic activity of  
475 pMEK, amplification from pMEK to pERK is lower in the BRAF<sup>V600E</sup> than the RAS channel.

476 The value of causal decomposition was illustrated when we investigated the observed increase in pERK  
477 levels in the BRAF<sup>V600E</sup> channel following EGF addition (blue, **Figure 2E**). This was unexpected, since,  
478 in MARM2.0, EGF only activates the RAS channel. We surmised that activation of the BRAF<sup>V600E</sup> channel  
479 might arise from retroactivity (Del Vecchio *et al*, 2008), in which downstream reactions affect upstream  
480 or parallel reactions by imposing a load on them, most commonly by competing for a limited pool of a  
481 regulators (Sauro, 2008). Using a counterfactual model, we confirmed that retroactivity in the BRAF<sup>V600E</sup>  
482 channel arose from sequestration of DUSP proteins by pERK in the RAS channel (**Figure S2E**). Thus,  
483 activation of the RAS channel can activate the BRAF<sup>V600E</sup> channel by reducing the rate of DUSP-  
484 dependent pERK dephosphorylation. A second example of causal decomposition involved experimental  
485 data showing that pMEK levels remain roughly constant over a 10<sup>5</sup>-fold range of RAFi concentrations (as  
486 monitored at the 5-minute peak of an EGF-induced pulse, **Figure 2F left**). Causal decomposition showed  
487 that this unexpected behavior arose from a steady reduction in the activity of the BRAF<sup>V600E</sup> channel (blue)  
488 with increasing RAFi and a simultaneous and offsetting increase in signaling in the RAS channel (orange).  
489 This was true of all 3 RAFi and 5 MEKi tested (**Figure S3**) and represents a classic case of pathway  
490 rewiring that is obscured at the level of total MAPK activity.

## 491 **Slow Transcriptional Feedbacks Imprint Drug-Adapted State and Unravel Cyclic Causal** 492 **Dependencies**

493 Experimental data (Gerosa *et al*, 2020; Lito *et al*, 2012; Pratilas *et al*, 2009) and model trajectories show  
494 that DUSP (blue), SPRY (orange), and EGFR (green) proteins (dark colors) and mRNA (light colors)  
495 levels are substantially lower in cells adapted to RAFi for 24 hours as compared to drug-naïve cells  
496 (**Figure 3A left, S2B,F**). This is consistent with the known role of MAPK activity in promoting the  
497 expression of negative (feedback) regulators. However, it raises the question: why is pERK only  
498 transiently activated by EGF in drug-adapted cells if feedback is suppressed? When we simulated the  
499 induction of ERK pulses by exogenous EGF in drug adapted cells, we observed modest increases in EGFR,  
500 DUSP and SPRY mRNA levels (**Figure 3A right**), consistent with respective experimental training data  
501 (**Figure S2F**). However, at the protein level DUSP and SPRY remained almost constant and EGFR

502 decreased. We surmised that this reflected the operation of transcriptional feedback on a longer time-scale  
503 (>2 h) than a typical EGF-mediated pulse (30-90 min). Model analysis showed that changes in EGFR  
504 protein levels were a consequence of receptor endocytosis, and degradation. Thus, EGFR trafficking and  
505 not negative feedback controls the duration of a pERK pulse in drug adapted cells, consistent with existing  
506 models of EGFR (Starbuck & Lauffenburger, 1992; Dessauges *et al*, 2021) and other transmembrane  
507 receptors (Becker *et al*, 2010). However, on the longer time-scale of drug adaptation, transcriptional  
508 feedback is the primary determinant of pERK levels. Similar separations in time-scale have been  
509 previously observed in other aspects of EGFR and MAPK signaling. For example, individual kinase  
510 phospho-states turn over on time scale of seconds but measurable changes in MAPK activity are a least  
511 hundred-fold slower, requiring minutes to hours (Kholodenko *et al*, 1999; Reddy *et al*, 2016; Kleiman *et*  
512 *al*, 2011). Thus, slow population average responses mask underlying biochemical reactions happening on  
513 much faster timescales.

514 The presence of feedback loops in a network usually generates cycles in the causal diagram (Mooij *et al*,  
515 2013) (**Figure 3B** left), complicating model analysis (Pearl & Dechter, 2013; Spirtes, 2013). In the case  
516 of MARM2.0, a cycle involving positive regulation of feedback regulators by MAPK activities means,  
517 for example, that pERK activity could ultimately control DUSP levels or DUSP levels could control pERK  
518 activity. However, time-scale separation makes it possible to generate an acyclic causal diagram for  
519 MARM2.0 (Hyttinen *et al*, 2012) (**Figure 3B** right), in which the effects of RAFi and MEKi on pERK are  
520 split into the rapid and immediate effects of drug on kinase activity (*direct drug action*, purple shading)  
521 and a slower process involving changes in the levels of feedback proteins (*drug adaption*, brown shading).  
522 Prior to EGF stimulation, when only the BRAF<sup>V600E</sup> channel is active (**Figure 2B** left), MEKi and/or RAFi  
523 levels control pERK levels in drug-adapted cells (*drug adapted pERK*; gray in **Figure 3B**), which in turn  
524 determine DUSP and SPRY concentration and, thus, the strength of negative feedback on pERK in the  
525 RAS channel (*transient pERK*, turquoise in **Figure 3B**). The indeterminacy between drug adapted pERK  
526 and DUSP levels remains (illustrated by a bidirectional edge in the graph), but this does not affect the  
527 determinacy between drug-adapted DUSP and transient pERK levels. Thus, time scale separation during  
528 drug adaption makes it possible to control the MAPK module in two distinct ways depending on the  
529 activating signal.

### 530 **MAPK Signaling is rewired by Drug Adaptation and Direct Inhibition**

531 The ratio of input to output signals in a network (the gain) is a fundamental property of a signal  
532 transduction system that can be used quantify rewiring. Gain often varies along a series of reactions in a

533 single channel – for example the number molecules of pERK generated per molecule of RAS-GTP as  
534 compared to EGF ligand. Gain could in principle be quantified by sensitivity (Goldbeter & Koshland,  
535 1981), but as a mathematical concept, sensitivity is defined at steady-state, whereas signaling in the RAS  
536 channel is transient. Sensitivity could also be computed pointwise at every time point (Chen *et al*, 2009),  
537 but this would not account for the fact that input and output signals for any specific step in a network often  
538 have different timescales. For example, modeling revealed conditions in which an input signal (e.g.,  
539 pEGFR levels) had started to fall following EGF stimulation, while a downstream event (e.g., formation  
540 of active RAS-GTP) was still increasing. We therefore defined the gain of a reaction channel as the ratio  
541 of  $L_\infty$  or  $L_1$  norms (with respect to a logarithmic timescale) between input and output signals in  
542 corresponding model trajectories (see Methods; Signaling Gain). The  $L_1$  norm quantifies the area under  
543 the curve of the signal whereas the  $L_\infty$  norm quantifies the height of the peak of the signal. Both represent  
544 scalar, time-independent quantities. For simplicity, we normalized gain to equal 1 in the absence of  
545 inhibition.

546 Gain for each of the two MAPK reaction channels can be investigated graphically using a formalism in  
547 which each node represents a “signal” that is defined as the sum of active model species, and edges  
548 represent signaling steps that are defined as the action of one or more PySB reaction rules. Gain was  
549 computed along each edge of the graph by computing the ratio of norms of input and output nodes. The  
550 graph in **Figure 4A** has been arranged so that each signaling step (edge) is affected by as few drug actions  
551 as possible – ideally only one - allowing changes in gain to be attributed to direct drug action (purple) or  
552 drug adaptation (brown). The graph contains three steps for the RAS channel (orange; steps R1-R3) and  
553 two steps for the BRAF<sup>V600E</sup> channel (blue; steps B2-B3) with the channels “aligned” at the third step  
554 (pMEK phosphorylation of ERK; **Figure 4A**). We then used the calibrated model to compute time-  
555 resolved signals for all nodes at multiple drug concentrations (**Figure 4B**) and determined the gain (**Figure**  
556 **4C**). To visually summarize the inhibitor and concentration-dependent states of the graph, we generated  
557 separate representations for RAFi (**Figure 4D**) and MEKi (**Figure 4E**), with signal activity indicated as  
558 node opacity and gain as edge opacity.

559 We found that drug adaptation to RAFi and MEKi had a similar impact on the first step (R1) of both  
560 reaction channels (**Figure 4C**, top panels). At low to medium drug concentrations (RAFi:  $\sim 10^{-4}$  to  $10^{-2}$   $\mu\text{M}$ ,  
561 MEKi  $\sim 10^{-5}$  to  $10^{-3}$   $\mu\text{M}$ ), the gain from pEGFR to RAS-GTP was close to zero representing complete  
562 inhibition of EGF-mediated signaling by the combined actions of feedback regulators such as DUSP and  
563 SPRY. At medium to high drug concentrations (RAFi:  $\sim 10^{-2}$  to  $10^{-1}$   $\mu\text{M}$ , MEKi:  $\sim 10^{-3}$  to

564  $10^{-0}\mu\text{M}$ ) a reduction in the levels of feedback regulators led to a relief of feedback and an increase in gain.  
565 At the second step, for medium to high RAFi and MEKi concentrations, we found that B2 had gain close  
566 to zero, but R2 gain was larger than one (**Figure 4C**, middle panels), indicating channel-specific effects  
567 for both drugs. For RAFi, we attributed this channel specificity to difference in the affinity of the RAFi  
568 for monomeric RAF in the BRAF<sup>V600E</sup> channel and dimeric RAF in the RAS channel (orange vs. blue  
569 colored nodes). The difference in affinity is determined by the thermodynamic parameter  $\Delta\Delta G_{dim}$  (**Box**  
570 **3**), which encodes the ratio of drug affinities for the first and second protomers of a RAF dimer; for  
571 vemurafenib this difference was estimated to be  $\sim 2.5 \times 10^3$ -fold (median of values from best 5% of fits).  
572 Thus, even at  $10\mu\text{M}$ , the highest vemurafenib concentration tested, and a value well above the clinically  
573 useful range,  $\sim 25\%$  of RAF dimers had one protomer not bound to drug (**Figure 4F**, left), a configuration  
574 that is active as a kinase (Karoulia *et al*, 2017). The estimated lower bound for  $\Delta\Delta G_{dim}$  corresponding to  
575  $\sim 60$  fold decrease in affinity is consistent with a previously reported values of 30-100 fold lower  $\text{IC}_{50}$  for  
576 a BRAF<sup>V600E</sup> relative to wild-type, as estimated from cell-based experiments with a splicing-variant that  
577 forms BRAF<sup>V600E</sup>-BRAF<sup>V600E</sup> dimers (Karoulia *et al*, 2016). Moreover, estimated ranges for  $\Delta\Delta G_{dim}$  were  
578 similar for the four other type I $\frac{1}{2}$  RAFi drugs we tested (**Figure S1**, **S4**). For MEKi, we attributed the  
579 channel specific potency in the second step to a decrease in MEK phosphorylation rate by BRAF<sup>V600E</sup> for  
580 BRAF-uMEK-MEKi complexes as compared to BRAF-uMEK complexes; modeling suggested a  $\sim 6.5 \times$   
581  $10^3$ -fold reduction in rate of reduction as compared to apo MEK with cobimetinib as the MEKi. Estimated  
582 values were similar ( $>800$  fold) for trametinib and PD0325901, but substantially lower ( $<200$  fold) for  
583 binimetinib and selumetinib, consistent with previously reported differences in the activity of these drugs  
584 (Pino *et al*, 2021). In all cases, the combination of lower RAFi affinity or lower MEKi-dependent  
585 phosphorylations rate resulted in incomplete inhibition of pMEK in the RAS channel (**Figure S3**).  
586 For the third step, we found that gain from pMEK to pERK (B3 and R3) increased at medium to high  
587 concentrations of RAFi (**Figure 4C**, bottom left panel), due to a reduction in DUSP expression levels. In  
588 contrast, MEKi did not have any effect on gain at medium concentrations ( $\sim 10^{-3}$  to  $10^{-2}\mu\text{M}$ , (**Figure 4C**,  
589 bottom right panel). This was unexpected, since the analysis described above shows that DUSP levels are  
590 controlled by drug-adapted pERK levels, which are inhibited at medium concentrations of MEKi and  
591 RAFi (blue, middle panels, **Figure 4C**). However, B3/R3 are the only steps in which the model  
592 implements two distinct effects for each drug: increases in ERK activity as a result of drug adaptation,  
593 i.e., DUSP downregulation, (brown, **Figure 4A**) and reductions in ERK activity via direct drug action by  
594 MEKi on MEK (purple, **Figure 4A**). Modeling suggested that direct drug action and adaptation balanced  
595 each other at intermediate MEKi concentrations and direct inhibition became dominant only at high



596 concentrations. The differential potency of MEKi for BRAF<sup>V600E</sup> (B3, blue) compared to the RAS  
597 channels (R3, orange) could also be due to a difference in affinity of MEKi for pMEK as compared to  
598 uMEK (see Section on Causal Decomposition) (Hatzivassiliou *et al*, 2013), which was encoded in the  
599 thermodynamic parameter  $\Delta\Delta G_p$  (**Figure 4F**). For cobimetinib, the inferred  $\Delta\Delta G_p$  values corresponded  
600 to a ~3.5-fold decrease in affinity, but for the four other MEKi tested this difference was >10-fold (**Figure**  
601 **S4**). Since the shift in MEKi potency for pERK activated by EGFR as compared to BRAF<sup>V600E</sup> activated  
602 pERK was ~100 fold (**Figure 2A, S2C**), we concluded that it likely arises from a combination of channel  
603 specific efficacy in the second step and balancing of direct drug action and drug adaptation in the third  
604 step. In this form of the model, the decreased affinity of MEKi for pMEK played only a minor role in  
605 channel specificity.

606 One interesting aspect of gain in MAPK signaling is that it varied independent of total activity of the  
607 signaling cascade or the flux of MAPK kinases and phosphatases (**Figure 4D,E**). For example, at high  
608 concentrations of RAFi, step B3 had high gain (due to low DUSP activity) but the channel was functionally  
609 inactive (due to RAFi-BRAF<sup>V600E</sup> binding). The interesting feature of this arrangement is that the anti-  
610 proliferative effects of RAFi are highly sensitive to anything able to activate MEK directly, such as a  
611 mutation in the kinase. Consistent with this, activating mutations such as MEK1<sup>C121S</sup> are observed to give  
612 rise to acquired drug resistance in patients (Wagle *et al*, 2011). High gain but low activity in the RAS  
613 channel is directly analogous, and potentiates both ligand-mediated RTK activation and RAS mutation  
614 (e.g., NRAS<sup>Q61K</sup> discussed below). More generally, it is possible that identifying signaling steps with low  
615 activity but high gain may help to pinpoint mechanisms of potential acquired drug resistance.

## 616 **Pulsatile Signaling Induces Apparent Drug Interactions**

617 MEK and RAF inhibitors are normally used in combination. To study drug interaction and also test the  
618 predictive power of MARM2.0 in conditions distinct from those used for model training, we simulated  
619 the effects of RAFi plus MEKi combinations on pERK levels with a model trained on single-drug  
620 responses alone (the model training described above). Drug dose-response relationships were then  
621 visualized as surface plots (**Figure 5A**) and isobolograms (**Figure 5B**). In the absence of exogenous  
622 growth factors (**Figure 5A(i)**), we predicted a monotonic decrease in pERK levels with increasing doses  
623 of both drugs (left panels) and experimental data were in agreement (right panels). In BRAFi- adapted and  
624 EGF stimulated cells, we predicted a more complex landscape (**Figure 5A(ii)**), in which pERK was  
625 relatively drug resistant along a L-shaped region (red dashed outline) at intermediate MEKi and high RAFi  
626 concentrations with a gradual decrease at high MEKi concentrations. Using isobolograms, we observed

627 disconnected level sets (bottom, **Figure 5B**), recapitulating the non-monotonic response to MEKi in  
628 **Figure 2A**, in which pERK levels first rose and then fell with increasing drug concentration. Experimental  
629 data (right panel, **Figure 5A(ii)**) was qualitatively similar to predictions (left panel) and differences were  
630 primarily in the magnitude of pERK, not the shape of the response surface (bottom, **Figure 5B**).  
631 Disconnected isobolograms (bottom, **Figure 5B**) are noteworthy, because measures of drug interactions  
632 such as Loewe additivity (Loewe, 1928) or the Chou-Talalay combination index (Chou *et al*, 1993) require  
633 a one-to-one mapping between dose and response (a bijective curve) and cannot be applied in this context.  
634 However, comparing pERK levels to null models for Bliss independence (Bliss, 1939) (Bliss, **Figure 5C**)  
635 and highest single agent (Lehár *et al*, 2007) (HSA, **Figure 5D**) revealed negligible drug interaction (white)  
636 in the absence of EGF (top panels) in simulation (left) and experimental data (right). Under conditions of  
637 EGF stimulation (bottom panels), we observed substantial discordance between the magnitude and sign  
638 of drug interaction as scored by Bliss criteria (**Figure 5C**) and HSA (**Figure 5D**). Thus, existing  
639 definitions of drug synergy and antagonism do not adequately describe the complex dose-response  
640 landscapes we observed.

641 When we decomposed dose-response surfaces for EGF-stimulated conditions (left, **Figure 5E**) into  
642 BRAF<sup>V600E</sup> (middle) and RAS channels (right). we observed little RAFi and MEKi interaction in the  
643 BRAF<sup>V600E</sup> channel (left, **Figure 5F**) and either a small level of synergy (blue) or strong antagonism (red)  
644 in the RAS channel depending on drug concentration (right). When we then computed gain in the RAS  
645 channel for R1, R2 and R3 (**Figure 4A**) at different drug concentrations, we observed low gain for R1 at  
646 RAFi and MEKi concentrations below 10 and 1 nM respectively (first panel, **Figure 5G**), high gain for  
647 R2 at all concentrations (second panel) and low gain for R3 at MEKi at >1 $\mu$ M (third panel). When the  
648 gain for steps R1-R3 was computed as pointwise multiplication of the three surfaces, the L-shaped region  
649 of drug resistant pERK (fourth panel) was regenerated (**Figure 5A(ii)**). Thus, the overall drug response  
650 landscape can be explained by the superposition of adaptive drug response on R1 (brown), and direct drug  
651 effects on R3 (purple).

## 652 **Sustained Signaling does not Induce Drug Interaction**

653 To study the effects of RAFi and MEKi on signaling in the RAS channel under conditions of sustained  
654 rather than transient EGFR activation, we over-expressed EGFR using CRISPRa (Gerosa *et al*, 2020),  
655 yielding two cell lines with 4-fold (light blue) and 9-fold (turquoise, referred to as A375 CRISPRa-EGFR  
656 below) increases in expression levels (**Figure 6A**). It has previously been shown that, when EGFR is  
657 overexpressed to this degree, mechanisms of receptor endocytosis and degradation are saturated and



658 EGFR becomes chronically rather than transiently active in the presence of ligand (Lund *et al*, 1990;  
659 Wiley, 1988; Kiyatkin *et al*, 2020). Consistent with this, we found that upon ligand addition, pERK levels  
660 in RAFi-adapted CRISPRa-EGFR cells rose rapidly to a peak at ~30 min and then fell slightly to level at  
661 roughly ~75% of their levels in the absence of RAFi exposure; pERK remained at this level for at least  
662 24h in both experiments and simulations. Under these conditions, RAFi had substantially lower efficacy  
663 ( $EC_{max}$ ; **Figure 6B**) and MEKi had lower potency ( $EC_{50}$ ; **Figure 6C**) than in cells not stimulated with  
664 EGF. Channel decomposition (**Figure 6B** right panels) revealed an increase in pMEK and pERK levels  
665 in the RAS channel (orange) and also in the BRAF channel (blue), which we ascribed to retroactivity  
666 (**Figure S6C**) and low DUSP levels (**Figure 6A**, bottom, dark blue). Analysis of pERK phase space with  
667 DUSP and SPRY mRNA levels and SPRY protein levels showed similar distributions at 8h post EGF-  
668 stimulation in drug-adapted CRISPRa-EGFR cells and pre EGF-stimulation in drug-adapted EGFR<sup>wt</sup>  
669 cells, suggesting a steady state had been reached at 8h post EGF-stimulation (**Figure S6D**). In contrast,  
670 DUSP protein levels at 8h post EGF-stimulation remained up to 3-fold below the levels observed at the  
671 same pERK levels pre EGF-stimulation, suggesting steady-state had not yet been reached, which is  
672 consistent with long DUSP protein half-life times observed in Western blot experiments (Lito *et al*, 2012).  
673 Thus, the relative resistance of EGFR amplified cells to RAFi and MEKi appears to result from sustained  
674 activation of the RAS channel and slow DUSP protein turnover.

675 When we predicted the pERK dose-response surface for combined RAFi and MEKi treatment of  
676 CRISPRa-EGFR cells (8h after stimulation with EGF) using single drug training data (**Figure 6D** left),  
677 we observed incomplete pERK inhibition at high RAFi and medium MEKi concentrations. The resulting  
678 isobolograms had a convex shape (**Figure 6E**) with minimal drug interaction by Bliss (**Figure 6F**) or HSA  
679 criteria (**Figure 6G**). This differs from what was observed with pulsatile RTK activation (**Figure 5C, D**  
680 bottom panels) and suggests that drug interactions in the case of pulsatile signaling were only possible  
681 due to time scale separation between drug adaption and direct drug action.

## 682 **Structure-Based Model Formulation Enables Generalization Across Inhibitor Classes**

683 In MARM2.0, the thermodynamic parameter  $\Delta\Delta G_{dim}$  describes changes in the stability of (RAFi-RAF)<sub>2</sub>  
684 complexes; these have been studied in detail via crystallographic structures (Rukhlenko *et al*, 2018).  
685 Negative  $\Delta\Delta G_{dim}$  values manifest themselves as a loss of drug affinity by the second protomer in a RAF  
686 dimer. It is well-established that this leads to lower RAFi efficacy in the RAS channel as compared to the  
687 BRAF<sup>V600E</sup> channel (**Figure 4C,F**). However, due to energy conservation (**Box 3**),  $\Delta\Delta G_{dim} < 0$  also results  
688 in a higher dissociation rate of RAF<sub>2</sub> complexes at high RAFi concentrations (**Figure S5**). Thus,

689 thermodynamically formulated models can describe the phenotypic response to inhibitors based on their  
690 allosteric properties.

691 In contrast to type I½ RAF inhibitors, type II inhibitors (also called panRAFi; **Box 2**) such as LY3009120  
692 and AZ-628 (Henry *et al*, 2015; Noeparast *et al*, 2018) inhibit both monomeric RAF in the BRAF<sup>V600E</sup>  
693 and dimeric RAF in the RAS channel with similar affinity. Crystallographic data suggest that this arises  
694 because panRAF inhibitors do not destabilize (RAFi-RAF)<sub>2</sub> complexes, i.e., they do not induce allosteric  
695 changes. To determine whether MARM2.0 correctly predicts the response to type II inhibitors based on  
696 the loss of allostery, we calibrated MARM2.0 using data from A375 CRISPRa-EGFR cells that were  
697 treated with LY3009120 (**Figure 7A**) or AZ-628 for 24h (**Figure S6A**), but not stimulated with EGF  
698 (**Figure S2C**). This allowed estimation of drug affinity for monomeric RAF ( $\Delta G$ );  $\Delta\Delta G_{dim}$  was fixed to 0  
699 to reflect loss of allostery. We then generated predictions for pMEK (top) and pERK (bottom) levels 8  
700 hours after EGF stimulation (red) in cells adapted to LY3009120 (**Figure 7A** left panels) or AZ-628  
701 (**Figure S7**). Predictions matched experimental data under the same conditions and causal decomposition  
702 confirmed that RAF was strongly inhibited in the RAS channel (right panels). We also observed good  
703 agreement between model predictions and experimental data for LY3009120 in combination with  
704 cobimetenib in EGF-stimulated, drug-adapted cells (**Figure 7B**). Analysis of drug interactions using HSA  
705 and Bliss criteria (**Figure 7C**) revealed a similar level of additivity (but little or no synergy) in model  
706 predictions and experimental data (note that the isoboles are curved not due to synergy but our use of  
707 logarithmic concentration axes). These data show that MARM2.0 can correctly predict the properties of  
708 different RAF inhibitors based on differences in their allosteric properties alone.

### 709 **Successes and Limitations in Extending MARM2.0 to Other Resistance Mechanisms**

710 NRAS<sup>Q61K</sup> is a frequently observed resistance mutations found in melanoma patients treated with  
711 RAF/MEK therapy (Long *et al*, 2014; Shi *et al*, 2014). We modelled NRAS<sup>Q61K</sup> as RTK-independent  
712 activation of the RAS channel (Burd *et al*, 2014), with baseline pERK levels inferred from drug-naïve  
713 NRAS<sup>Q61K</sup> BRAF<sup>V600E</sup> double mutant melanoma cells (**Figure 8A**). Under these conditions, simulations  
714 recapitulated higher baseline pERK and predicted 7-fold lower efficacy for RAFi (NRAS<sup>Q61K</sup>, turquoise;  
715 left panels) and 4-fold lower potency for MEKi (**Figure 8B** right panels) as compared to NRAS wildtype  
716 cells (NRAS<sup>wt</sup>, purple). These predictions were confirmed in A375 cells engineered to conditionally  
717 express NRAS<sup>Q61K</sup> (Yao *et al*, 2015), but the observed loss of MEKi potency was even greater than  
718 modeling predicted (30-fold). Causal decomposition of (modelled) pERK activity in the presence of drug  
719 combinations (varying MEKi plus 1 $\mu$ M RAF; **Figure 8C**) showed that 1 $\mu$ M RAFi was sufficient to

720 completely block activity in the BRAF<sup>V600E</sup> channel (blue) without affecting the RAS channel (**Figure 8B**  
721 and **8C**). This made it possible to study NRAS<sup>Q61K</sup> signaling without interference from the BRAF<sup>V600E</sup>  
722 oncogene.

723 Based on this insight we devised a triple combination experiment to study drug interactions between  
724 panRAFi and MEKi in the RAS channel alone (**Figure 8D**, top left panel). A375- BRAF<sup>V600E</sup> NRAS<sup>Q61K</sup>  
725 cells were grown in the presence of 1 $\mu$ M vemurafenib plus different concentrations of LY3009120 and  
726 cobimetinib for 24h and pERK levels then determined (top right panel). In contrast to the analogous  
727 experiment without 1 $\mu$ M vemurafenib (**Figure 7C**), we observed pronounced synergy (blue) at low to  
728 medium concentrations of both inhibitors (~1-100nM) by Bliss (bottom left panel) and HSA criteria  
729 (bottom right panel). Similar synergy has previously been observed in KRAS-driven cell lines of diverse  
730 origins (Yen *et al*, 2018). However, we found that the effects of combining three drugs in double mutant  
731 cells A375 cells were not accurately captured by MARM2.0 (**Figure S7**). We hypothesized that drug  
732 synergy is likely to arise due to a combined allosteric effect of both drugs on RAS-RAF-MEK complexes,  
733 as similar interactions have been described for combined treatment of MEKi and APS-2-79, a type II  
734 inhibitor of the KSR scaffolding protein (**Box 2**) (Dhawan *et al*, 2016). MARM2.0 does not include such  
735 allosteric effects and was not trained on combination data that would be necessary to infer the strength of  
736 the combined effect *a posteriori*. This limitation of MARM2.0 can be rectified in future studies, but serves  
737 to reveal how the subtleties of drug interactions can be relatively difficult to discern when multiple parallel  
738 reaction channels are active.

### 739 **Model for Melanoma Cell Line Generalizes to Colorectal Cell Line**

740 BRAF<sup>V600E</sup> mutations are found in a variety of cancers other than melanoma, notably colorectal cancers.  
741 To investigate whether MARM2.0 could predict the responses of BRAF<sup>V600E</sup> colorectal cancers to RAFi,  
742 we collected data from HT29 cells, which carry a BRAF<sup>V600E</sup> mutation and have high EGFR expression  
743 (similar to A375 EGFR-CRISPRa cells). We anticipated that BRAF<sup>V600E</sup> channel would be a primary  
744 driver of pERK levels in the absence of EGF (**Figure 9A**) and the RAS channel in the presence of EGF  
745 (**Figure 9B**). To instantiate MARM2.0 for HT29 cells, we rescaled baseline protein and mRNA expression  
746 levels according to relative abundances in proteomic and transcriptomic data from the Cancer Cell Line  
747 Encyclopedia (Barretina *et al*, 2012; Nusinow *et al*, 2020). We simulated pERK drug response for RAFi  
748 plus MEKi combinations for HT29 cells (bottom) and compared to simulations for A375 CRISPRa-EGFR  
749 (top) and Dox inducible NRAS<sup>Q61K</sup> A375 cells (middle). In all three cell lines, model predictions (left)  
750 demonstrated pERK inhibition in high-dose combinations, a result confirmed by experimental data (right);

751 **Figure 9C**). Under conditions of EGF-stimulation, simulations and data revealed drug-resistant ERK  
752 activation (**Figure 9D**) and an ~10-fold rightward shift in RAFi and MEKi dose-response curves (red  
753 arrows). Causal decomposition (**Figure 9E**) confirmed that these changes in drug potency are a  
754 consequence of profound differences between the BRAF<sup>V600E</sup> (left) and RAS (right) reaction channels.  
755 The remarkably good agreement between MARM2.0 predictions and data in three different settings in  
756 which RAFi resistance is observed (EGF treatment in BRAF<sup>V600E</sup> melanoma and colorectal cancer and  
757 NRAS<sup>Q61K</sup> expression in BRAF<sup>V600E</sup> melanoma) suggests that the model correctly unifies the key features  
758 of allosteric regulation of oncogenic MAPK signaling.

## 759 **DISCUSSION**

760 In this manuscript we describe a quantitative framework for analyzing “pathway rewiring” with specific  
761 reference to rewiring involved in adaptive resistance to MEK and RAF inhibitors in BRAF<sup>V600E</sup>  
762 melanoma. We described new analytical methods and a mass-action kinetic model (MARM2.0) that  
763 substantially extends previous models of MAPK signaling by using an energy-based formalism to  
764 efficiently represent allosteric regulation of MAPK kinases and the complexes they form with each other  
765 and with small molecule drugs. Among other analysis, we used MARM2.0 to predict and understand  
766 resistance in the context of an NRAS mutation that is frequently observed in melanoma patients who  
767 acquire resistance to MEK and RAF inhibitors and BRAF<sup>V600E</sup> colorectal cancer cells that are intrinsically  
768 resistant to RAFi.

769 The MAPK cascade, and RTKs acting upstream of it, are among the signal transduction systems most  
770 intensively studied using systems of ODEs and dynamical systems analysis. Adaptive drug resistance in  
771 BRAF<sup>V600E</sup> melanoma therefore represent an excellent setting in which to advance the state of the art in  
772 mechanistic modeling of intracellular networks. Moreover, whether adaptive or acquired, resistance to  
773 MEK and RAF inhibitors is directly relevant to patient outcomes: many individuals with BRAF<sup>V600E</sup>  
774 melanoma experience rapid and live-saving remission with relatively little adverse effect. However, the  
775 frequent and rapid emergence of drug resistance (often within a year of the start of treatment) dramatically  
776 reduces survival. Preventing the acquisition of drug resistance is widely seen as the key to achieving more  
777 durable responses to MEK-RAF inhibitors and targeted anti-cancer drugs in general.

778 MARM2.0 fits well to over 900 data points in over 200 experimental conditions, requiring only eleven  
779 proteins, three mRNA species and three small molecule drugs. However, capturing the known activities,  
780 interactions, and structural features of these relatively few molecules involved a network of over 30,000  
781 distinct biochemical reactions. MARM2.0 accurately predicted the responses of cells to ten different

782 investigational and approved small-molecule kinase inhibitors in over 1600 experimental conditions,  
783 including drug combinations outside of the training dataset. While resistance in many of these conditions  
784 has been attributed to specific mechanisms (Haling *et al*, 2014; Hatzivassiliou *et al*, 2010; Lito *et al*, 2012,  
785 2014; Poulikakos *et al*, 2010; Solit *et al*, 2006; Yao *et al*, 2015), we distilled decades of structural,  
786 biochemical and cell biological work into a single model that provides a self-consistent, unifying picture  
787 of RAFi and MEKi resistance in BRAF mutant cancers. The model also correctly captures detailed  
788 biochemical properties of MAPK inhibitors without having been explicitly trained on the respective  
789 biochemistry: one example is the profound inhibition of EGF activated pERK signaling by type II RAF  
790 inhibitors. These features of our model increase confidence that it is a useful and relatively faithful  
791 representation of the essential features of intracellular biochemistry. However, some subtleties of MAPK  
792 regulation are missing from the model, including the kinase-kinase interactions mediated by KSR  
793 scaffolding proteins. The relevance of scaffolding becomes evident in BRAF<sup>V600E</sup> NRAS<sup>Q61K</sup> cells  
794 exposed to multiple kinase inhibitors. It will be straightforward to add to these features to the model as  
795 additional training data becomes available.

796 In the treatment of melanoma, RAF and MEK inhibitors are used in combination, which is consistent with  
797 the more general use of drug combinations to improve reduce resistance to targeted therapy (Lehár *et al*,  
798 2009). Simulation represents an effective way to investigate mechanisms of drug interaction (Fröhlich *et al*,  
799 2018; Yuan *et al*, 2020) and it has been postulated, on theoretical grounds, that inhibition of enzymes  
800 acting sequentially in a pathway is a means to achieve synergistic drug interaction (Yin *et al*, 2014;  
801 Fitzgerald *et al*, 2006). However, both data and modeling show that the activities of RAF and MEK  
802 inhibitors in BRAF<sup>V600E</sup> cells are additive over the great majority of the dose-response landscape. In those  
803 rare conditions in which drug synergy or antagonism is observed, analysis suggests that transcriptional  
804 feedback and allosteric interaction – rather than the presence of a serial network motif *per se* – is  
805 responsible for drug interaction.

806 MARM2.0 demonstrates how adaptive drug resistance in BRAF<sup>V600E</sup> melanoma cells arises from the co-  
807 existence in cells of two functionally distinct MAPK reaction channels. Signaling in one channel is  
808 initiated by the constitutive activity of oncogenic BRAF<sup>V600E</sup> and signaling in the other by RAS, which is  
809 in turn activated by RTKs. While it is conceptually convenient to depict the BRAF<sup>V600E</sup> and RAS channels  
810 as two different “pathways” (something we do for convenience in **Figure 4**) the actual mechanisms in  
811 cells involve shared molecular components: the two reaction channels comprise transient oligomers that  
812 involve similar, if not identical, proteins whose dynamic assembly and disassembly allows component  
813 exchange. Depending on conditions, one or the other reaction channels can be dominant in regulating



814 ERK, but the two channels can also operate concurrently, masking each other's activity. For example, in  
815 EGF-treated cells, pMEK levels remain roughly constant over a  $10^5$ -fold range of RAFi because signaling  
816 transitions from the BRAF<sup>V600E</sup> to the RAS channel. The BRAF<sup>V600E</sup> and RAS channels also influence  
817 each other directly, via retroactivity, and indirectly via control over the synthesis of feedback regulators.  
818 An additional feature of these reactions is that they operate on multiple time scales; in the case of the RAS  
819 channel this includes: (i) a time scale of seconds to minutes involving post-translational modifications and  
820 the direct action of inhibitory drugs (ii) a time scale of tens of minutes involving receptor internalization,  
821 degradation and recycling and (iii) a time scale of hours involving changes in the levels of negative  
822 feedback regulators such as DUSPS and SPRY. Time-scale separation between signal propagation and  
823 transcriptional rewiring is necessary for pulsatile signaling to escape from negative feedback and  
824 homeostatic control.

825 Methodological innovation in the current paper focuses on combining rule-based modeling based on PySB  
826 and BNG with thermodynamic formalisms that exploit the fact that protein-protein and protein-small  
827 molecule binding and unbinding events do not consume energy. This builds on the work of Kholodenko  
828 on energy-balanced ODE models (Kholodenko, 2015) while creating a general-purpose framework for  
829 programmatically generating model families that make model calibration more efficient. Submodels were  
830 generated in PySB to optimally exploit the perturbational structure of the training data (the inclusion or  
831 not of drugs and growth factors in each experiment) and combined this with multi-model parameter  
832 estimation in the pyPESTO toolbox to substantially accelerate model training, an important consideration  
833 with large ODE models and complex training data. Furthermore, PySB/BNG enabled us to implement a  
834 labelling scheme for causal network decomposition that traces how species such as activated ERK (e.g.  
835 pERK) are generated by converging upstream reaction channels. Analogous generation and analysis of  
836 causal traces ("stories") has been described in agent-based modeling (Boutillier *et al*, 2018) and their  
837 adaptation to the MARM2.0 ODE model was essential for formalizing the concept of network rewiring.  
838 These and other methods are generally applicable to other models in PySB (Lopez *et al*, 2013) although,  
839 in its current implementation, labeling is only designed to trace a sequence of activating events.

840 Using energies ( $\Delta G$  and  $\Delta\Delta G$  values), rather than kinetic rates, to describe molecular interactions is a  
841 more natural and extendable framework for parameterizing biochemical models. Energies can be  
842 estimated from structural studies, from mass-spectrometry measurements (Mason & Covert, 2018; de  
843 Souza & Picotti, 2020), and increasingly from folding and docking algorithms that combine biophysical  
844 understanding of protein structure with deep learning (AlQuraishi & Sorger, 2021; Jumper *et al*, 2021).  
845 Approximate energy values can also mitigate the parametric uncertainty that is a pervasive to dynamical

846 models: We anticipate that use of measured or estimated energy values will, in the future, make it possible  
847 to place fairly tight priors on parameter values during model calibration, generating more predictive and  
848 more interpretable models. Moreover, the use of energy methods promises to bridge the gap between fine-  
849 grained atomistic and structural data on single proteins and protein complexes and the more coarse-grained  
850 description of biomolecular interactions that are used for dynamical modelling of cellular networks. We  
851 anticipate that this will facilitate the multi-scale analysis of allosteric interactions in the assembly of multi-  
852 protein(-drug) complexes, and the identification of non-obvious emergent properties.

853

## 854 **MATERIAL AND METHODS**

855 All code that was used to calibrate the model, make predictions and generate figures is available at  
856 <https://github.com/labsyspharm/marm2-supplement>

### 857 **Cell lines and tissue culture**

858 The following cell lines were used in this study with their source indicated in parenthesis: A375 (ATCC),  
859 A375 with CRISPRa EGFR overexpression (constructed from ATCC stock as reported in (Gerosa *et al*,  
860 2020)), HT29 (Merrimack Pharmaceuticals) and A375 with doxycycline-inducible NRAS<sup>Q61K</sup> (Yao *et al*,  
861 2015) (provided by Neal Rosen's lab at Memorial Sloan Kettering Cancer Center). A375 cells were grown  
862 in Dulbecco's modified eagle medium with 4.5 g/l D-glucose, 4 mM L-glutamine, and 1 mM sodium  
863 pyruvate (DMEM) (Corning), supplemented with 5% FBS. HT29 cells were grown in RPMI media with  
864 L-glutamine supplemented with 10% FBS (50 mL). All media were supplemented with 1% penicillin and  
865 streptomycin. Cells were tested for mycoplasma contamination using the MycoAlert mycoplasma  
866 detection kit (Lonza).

### 867 **Drugs and growth factors**

868 The following chemicals from MedChem Express were dissolved in dimethyl sulfoxide (DMSO) at 10  
869 mM: vemurafenib, LY3009120, AZ-628, cobimetinib. EGF ligand was obtained from Peptrotech (cat#  
870 100-15) and prepared in media supplemented with 0.1% bovine serum albumin.

### 871 **Experimental design for combined genetic, ligand and drug perturbations**

872 A375 cells with CRISPRa EGFR overexpression and HT29 cells were treated with the indicated drugs for  
873 24 hrs before being stimulated with EGF or mock-media for 8 hours. A375 cells with doxycycline-  
874 inducible NRAS<sup>Q61K</sup> were treated with doxycycline (10  $\mu$ M) or mock-media for 24 hours before being  
875 treated with the indicated drugs for 24 hours.



## 876 **Immunofluorescence staining, quantitation, and analysis for cell cultures**

877 The following primary and conjugated antibodies with specified vendor, animal sources and catalogue  
878 numbers were used in immunofluorescence analysis of cells and tissues at the specified dilution ratios: p-  
879 ERKT202/Y204 rabbit mAb (Cell Signaling Technology, clone D13.14.4E, Cat# 4370), 1:800; p-  
880 MEKS217/221 rabbit mAb (Cell Signaling Technology, Cat# 9121) 1:200, ANTI-FLAG® mouse mAb  
881 (Sigma Aldrich, Cat# F1804), 1:1000. Immunofluorescence assays for cultured cells were performed  
882 using cells seeded in either 96-well plates (Corning Cat#3603) or 384-well plates (CellCarrier  
883 Cat#6007558) for 24 hr and then treated with compounds or ligands either using a Hewlett-Packard D300  
884 Digital Dispenser or by manual dispensing.

885 Cells were fixed in 4% PFA for 30 min at room temperature (RT) and washed with PBS with 0.1% Tween-  
886 20 (Sigma) (PBS-T), permeabilized in methanol for 10 min at RT, rewashed with PBS-T, and blocked in  
887 Odyssey blocking buffer (OBB LI-COR Cat. No. 927401) for 1 hr at RT. Cells were incubated overnight  
888 at 4 °C with primary antibodies in OBB. Cells were then stained with rabbit and/or with mouse secondary  
889 antibodies from Molecular Probes (Invitrogen) labeled with Alexa Fluor 647 (Cat# A31573) or Alexa  
890 Fluor 488 (Cat# A21202) both at 1:2000 dilution. Cells were washed with PBS-T and then PBS and were  
891 next incubated in 250 ng/mL Hoechst 33342 and 1:2000 HCS CellMask™ Blue Stain solution (Thermo  
892 Scientific) for 20 min. Cells were washed twice with PBS and imaged with a 10× objective using a  
893 PerkinElmer Operetta High Content Imaging System. 9-11 sites were imaged in each well for 96-well  
894 plates and 4-6 sites for 384-well plates.

895 Image segmentation, analysis, and signal intensity quantitation were performed using the Columbus  
896 software (PerkinElmer). Cytosol and nuclear areas were identified by using two different thresholds on  
897 the CellMask™ Blue Stain (low intensity) and Hoechst channels (~100-fold more intense) were used to  
898 define cytosolic and nuclear cell masks, respectively. Cells were identified and enumerated according to  
899 successful nuclear segmentation. Unless otherwise specified, immunofluorescence quantifications are  
900 average signals of the cytosolic area. In the case of the doxycycline-inducible NRAS<sup>Q61K</sup> A375 cells, low  
901 FLAG intensity was used to remove from analysis cells not expressing FLAG-tagged NRAS<sup>Q61K</sup>: in  
902 conditions with doxycycline addition FLAG intensity distributions were markedly bimodal with less than  
903 40% of cells being FLAG negative. Population averages were obtained by averaging values from single-  
904 cell segmentation using custom MATLAB 2017a code.

## 905 **MultiModel Fitting**

906 To the best of our knowledge, all state-of-the-art toolboxes only allow for fitting of individual models. To  
907 allow for simultaneous training of multiple models, we implemented the *AggregatedObjective* class in  
908 pyPESTO (<https://github.com/ICB-DCM/pyPESTO>), which implements the mapping between global  
909 optimization variables as well as respective gradients and local model parameter values and gradients.

910 To generate the individual model variants, we implemented the function  
911 *MARM.model.get\_model\_instance*, which uses PySB to programmatically remove subsets of initial values  
912 of EGF, RAFi and MEKi species. For network generation we use BNG to construct differential equations  
913 only for species with non-zero concentrations. To further reduce computational burden we implemented  
914 the function *MARM.model.cleanup\_unused*, which programmatically inspects the generated model and  
915 removes unused rules, expressions, parameters and energy patterns.

## 916 **Model Calibration**

917 Model optimization was performed using pyPESTO 0.2.10 (<https://doi.org/10.5281/zenodo.5827905>)  
918 with fides (Fröhlich & Sorger) version 0.7.5 (<https://doi.org/10.5281/zenodo.6038127>) as optimizer and  
919 AMICI (Fröhlich *et al*, 2021) version 0.11.25 (<https://doi.org/10.5281/zenodo.6025361>) as simulation  
920 engine.  $10^3$  optimization runs were performed using randomly sampled initial parameter values. Parameter  
921 boundaries that were used for initial value sampling and as constraints for optimization are provided in  
922 the function *MARM.estimation.get\_problem* in the supplementary material. Initial parameter values where  
923 objective function values could not be evaluated were resampled until evaluation was possible.  
924 Optimization convergence settings were  $10^{-12}$  as step-size tolerance and  $10^{-4}$  as absolute gradient  
925 tolerance. Objective function gradients were computed using forward sensitivity analysis. Integration was  
926 limited to  $10^6$  steps and integration tolerances were set to  $10^{-11}$  (absolute) and  $10^{-9}$  (relative). Steady-state  
927 tolerances were set to  $10^{-9}$  (absolute) and  $10^{-7}$  (relative).

## 928 **Causal Signal Decomposition**

929 To track the causal origin of MEK and ERK phosphorylation, we introduced the concept of reaction  
930 channels, which combines ideas from causal pathway analysis (Babur *et al*, 2018) and causal lineage  
931 tracing (Boutillier *et al*, 2018): Causal pathway analysis explains the response to a perturbation by  
932 identifying a sequence of regulatory mechanisms consistent with experimental data. This is equivalent to  
933 finding a path in the causal analysis graph, constructed from the knowledge graph, that connects the  
934 perturbation with the experimentally observed quantity (Babur *et al*, 2018; Sharp *et al*, 2019). For rule-

935 based models, the causal analysis graph is equivalent to the influence map. Agent based simulations of  
936 rules-based models can be represented as random walks on the influence map (Cristescu *et al*, 2019).  
937 Accordingly, causal relationships can be extracted by analyzing the traces of individual agents on the  
938 knowledge graph (Boutillier *et al*, 2018). As ODE representations of rule-based models describe the  
939 average of a population of agents, individual traces are not available and cannot be used to extract causal  
940 properties.

941 To assign phosphorylated MEK and ERK to the BRAF<sup>V600E</sup> and RAS channels, we added a ‘channel’ site  
942 to MEK and ERK molecules, which acts as a tag to track the source of phosphorylation. Upon  
943 phosphorylation of MEK, this channel site is set according to the source of phosphorylation ‘phys’ for  
944 phosphorylation by RAS bound RAF dimers and ‘onco’ for phosphorylation by mutated BRAF. The rule-  
945 based model formulation ensures that the channel information is propagated on all subsequent modeling  
946 steps. For the phosphorylation of ERK, we implement two separate rule variants that set the channel site  
947 according to the value channel of the phosphorylating MEK molecule. For both pMEK and pERK, the  
948 label is set to ‘NA’ during both dephosphorylation and initialization.

#### 949 **Signaling Gain**

950 In systems biology, strength of signal transmission is typically quantified as response coefficient or  
951 logarithmic gain

$$952 \quad R = \frac{\frac{\Delta T}{T}}{\frac{\Delta S}{S}}$$

953 between an input S and an output T at steady-state. However, this definition is not applicable for transient,  
954 temporally resolved signals as the response coefficient does not account for the time dimension. As there  
955 typically are delays in signal transduction, a pointwise evaluation at individual timepoints does not yield  
956 meaningful results.

957 In signal processing, the gain of linear time invariant systems can be computed as norm of the transfer  
958 function G

$$959 \quad \|G\| = \left\| \frac{L\{T(t)\}}{L\{S(t)\}} \right\|$$

960 which permits the computation of a gain even for time-resolved inputs  $S(s)$  and outputs  $T(t)$ . However,  
961 for nonlinear systems, such as the model we developed, a transfer function generally does not exist.

962 However, we here extend the idea of using functionals such as the Laplace function to map time-resolved  
963 input and outputs to scalar values which can then be used to compute the gain. Specifically, we propose  
964 the supremum norm

$$965 \quad \|S\|_{\infty} = S(t)$$

966 as well as an L1 norm with exponential time transformation

$$967 \quad \|S\|_1 = \int_{\log t_0}^{\log t_f} S(e^t) dt$$

968 The supremum norm effectively computes the gain evaluated at the peak of the signal, while the L1 norm  
969 computes the gain between the area under the curve, where the exponential time transformation aims to  
970 avoid problems when signals live on multiple timescales.

971 The natural scale of gains is the ratio of molecules or concentrations. However, pronounced parameter  
972 variability in the estimates for scaling factors, suggested that absolute molecular concentrations were not  
973 subject to large uncertainties, which would propagate to these norm estimates. Accordingly, we  
974 normalized all gains such that baseline signal transmission had a gain of 1.

975 To numerically compute supremum and L1 norm, we used 50 log-uniformly spaced time points between  
976  $10^{-4}$  and  $10^1$  h. The integral was approximated using the *sklearn.auc* function, which uses the trapezoidal  
977 rule.

978 Despite substantial variability in parameter estimates (**Figure S1**), we found that the variability in  
979 qualitative dependence of gain on RAFi and MEKi concentrations is low. We observed the highest  
980 variability in the gain from RAS-GTP to physiological pMEK. This is not surprising, as there is no  
981 experimental data on RAS-GTP levels. However, the variability appears to primarily affect the absolute  
982 levels of signaling gain and less the shape of the dose response curve. Overall, this indicates that our  
983 conclusions were not subject to parameter non-identifiability. Moreover, we found that the signaling gain  
984 analysis is consistent across different RAFis and MEKis for L1 and  $L_{\infty}$  norms (**Figure S4**), further  
985 corroborating the validity of the approach.

### 986 **Predictions for NRAS mutant cell lines**

987 In lack of quantitative measurements of mutant NRAS protein abundances in cell lines with acquired or  
988 mutated NRAS, we inferred respective levels from baseline data. In the model, the NRAS mutation was  
989 implemented through a constitutive GTP loading reaction that activates RAF independent of upstream  
990 receptor activity. Only the rate of this reaction was estimated when retraining on baseline data from

991 respective cell-lines, while all other parameters were kept fixed. For the cell line with acquired NRAS  
992 mutation, pERK scaling and offset parameters were simultaneously re-estimated from baseline and naive  
993 cell data due to account for difference in data normalization.

#### 994 **Computation of $EC_{50}$ and $EC_{max}$ values**

995  $EC_{50}$  and  $EC_{max}$  were computed by fitting a three-parameter hill function

$$996 \quad EC_{min} - \frac{EC_{min} - EC_{max}}{1 + \frac{EC_{50}}{x}} = y(x)$$

997 to either experimental data or model simulations, where  $x$  are drug concentrations and  $y$  are pMEK or  
998 pERK levels.  $EC_{min}$  (search interval  $[0, 2.5]$ , initial 0.5) and  $EC_{max}$  (search interval  $[0,1.5]$ , initial  
999  $\min(\max(y(x_{min}), 0), 2.5)$ ) were estimated on a linear scale while  $EC_{50}$  (search interval  $[x_{min}, x_{max}]$ ,  
1000 initial  $x_{median}$ ) was estimated on a logarithmic scale. *scipy.optimize.least\_squares* was used for curve  
1001 fitting.

#### 1002 **ACKNOWLEDGEMENTS**

1003 We thank Eduardo Sontag and Pencho Yordanov for helpful discussions. We thank Chris Chidley,  
1004 Gabriela Sanchez and Sreeram Vallabhaneni for help with experiments. We thank Zhan Yao and Neal  
1005 Rosen at MSKCC for providing the NRAS<sup>Q61K</sup> inducible A375 cell line. We thank the Nikon Imaging  
1006 Center at HMS for assistance with microscopy and the O2 High Performance Compute Cluster for  
1007 computing support. The work was funded primarily by NCI grant U54-CA225088 (P.K.S.), a Novartis  
1008 Foundation fellowship to L.G., HFSP grant LT000259/2019-L1 to F.F..

#### 1009 **AUTHOR CONTRIBUTIONS**

1010 FF conceived and performed model analysis. LG conceived and performed experiments. LG and FF  
1011 constructed the model. JM implemented energy support in PySB. PKS supervised the work. FF, LG and  
1012 PKS wrote the manuscript. All authors reviewed and approved the final version.

#### 1013 **CONFLICT OF INTERESTS**

1014 PKS is a member of the SAB or Board of Directors of Glencoe Software, Applied Biomath, and RareCyte  
1015 Inc. and has equity in these companies; PKS is also a member of the SAB of NanoString and a consultant  
1016 for Montai Health and Merck. LG is currently an employee of Genentech. PKS and LG declare that none  
1017 of these relationships are directly or indirectly related to the content of this manuscript.

## 1018 REFERENCES

- 1019 Aldridge BB, Burke JM, Lauffenburger DA & Sorger PK (2006) Physicochemical modelling of cell  
1020 signalling pathways. *Nat Cell Biol* 8: 1195–1203
- 1021 AlQuraishi M & Sorger PK (2021) Differentiable biology: using deep learning for biophysics-based and  
1022 data-driven modeling of molecular mechanisms. *Nat Methods* 18: 1169–1180
- 1023 Alwan HAJ, Zoelen EJJ van & Leeuwen JEM van (2003) Ligand-induced Lysosomal Epidermal Growth  
1024 Factor Receptor (EGFR) Degradation Is Preceded by Proteasome-dependent EGFR De-ubiquitination  
1025 \*. *J Biol Chem* 278: 35781–35790
- 1026 Arrhenius S (1889) Über die Reaktionsgeschwindigkeit bei der Inversion von Rohrzucker durch Säuren.  
1027 *Z Für Phys Chem* 4U: 226–248
- 1028 Babur Ö, Luna A, Korkut A, Durupinar F, Siper MC, Dogrusoz U, Aslan JE, Sander C & Demir E (2018)  
1029 Causal interactions from proteomic profiles: molecular data meets pathway knowledge. *bioRxiv*:  
1030 258855
- 1031 Barretina J, Caponigro G, Stransky N, Venkatesan K, Margolin AA, Kim S, Wilson CJ, Lehár J, Kryukov  
1032 GV, Sonkin D, *et al* (2012) The Cancer Cell Line Encyclopedia enables predictive modelling of  
1033 anticancer drug sensitivity. *Nature* 483: 603–607
- 1034 Batzer AG, Rotin D, Ureña JM, Skolnik EY & Schlessinger J (1994) Hierarchy of binding sites for Grb2  
1035 and Shc on the epidermal growth factor receptor. *Mol Cell Biol* 14: 5192–5201
- 1036 Becker V, Schilling M, Bachmann J, Baumann U, Raue A, Maiwald T, Timmer J & Klingmüller U (2010)  
1037 Covering a broad dynamic range: information processing at the erythropoietin receptor. *Science* 328:  
1038 1404–1408
- 1039 Blinov ML, Faeder JR, Goldstein B & Hlavacek WS (2004) BioNetGen: software for rule-based modeling  
1040 of signal transduction based on the interactions of molecular domains. *Bioinformatics* 20: 3289–3291
- 1041 Blinov ML, Faeder JR, Goldstein B & Hlavacek WS (2006) A network model of early events in epidermal  
1042 growth factor receptor signaling that accounts for combinatorial complexity. *Biosystems* 83: 136–151
- 1043 Bliss CI (1939) The Toxicity of Poisons Applied Jointly. *Ann Appl Biol* 26: 585–615
- 1044 Boutillier P, Maasha M, Li X, Medina-Abarca HF, Krivine J, Feret J, Cristescu I, Forbes AG & Fontana  
1045 W (2018) The Kappa platform for rule-based modeling. *Bioinformatics* 34: i583–i592
- 1046 Burd CE, Liu W, Huynh MV, Waqas MA, Gillahan JE, Clark KS, Fu K, Martin BL, Jeck WR, Souroullas  
1047 GP, *et al* (2014) Mutation-Specific RAS Oncogenicity Explains NRAS Codon 61 Selection in  
1048 Melanoma. *Cancer Discov* 4: 1418–1429
- 1049 Burotto M, Chiou VL, Lee J-M & Kohn EC (2014) The MAPK pathway across different malignancies: A  
1050 new perspective. *Cancer* 120: 3446–3456
- 1051 Chen WW, Schoeberl B, Jasper PJ, Niepel M, Nielsen UB, Lauffenburger DA & Sorger PK (2009) Input–  
1052 output behavior of ErbB signaling pathways as revealed by a mass action model trained against  
1053 dynamic data. *Mol Syst Biol* 5
- 1054 Chis O-T, Banga JR & Balsa-Canto E (2011) Structural identifiability of systems biology models: A  
1055 critical comparison of methods. *PLoS ONE* 6: e27755
- 1056 Chou T-C, Tan Q-H & Sirotnak FM (1993) Quantitation of the synergistic interaction of edatrexate and  
1057 cisplatin in vitro. *Cancer Chemother Pharmacol* 31: 259–264
- 1058 Clarke CN & Kopetz ES (2015) BRAF mutant colorectal cancer as a distinct subset of colorectal cancer:  
1059 clinical characteristics, clinical behavior, and response to targeted therapies. *J Gastrointest Oncol* 6:  
1060 660–667
- 1061 Corbalan-Garcia S, Yang SS, Degenhardt KR & Bar-Sagi D (1996) Identification of the mitogen-activated  
1062 protein kinase phosphorylation sites on human Sos1 that regulate interaction with Grb2. *Mol Cell Biol*
- 1063 Cristescu I, Fontana W & Krivine J (2019) Interactions between Causal Structures in Graph Rewriting  
1064 Systems. *Electron Proc Theor Comput Sci* 286: 65–78



- 1065 Davies H, Bignell GR, Cox C, Stephens P, Edkins S, Clegg S, Teague J, Woffendin H, Garnett MJ,  
1066 Bottomley W, *et al* (2002) Mutations of the BRAF gene in human cancer. *Nature* 417: 949
- 1067 Del Vecchio D, Ninfa AJ & Sontag ED (2008) Modular cell biology: retroactivity and insulation. *Mol*  
1068 *Syst Biol* 4: 161
- 1069 Dessauges C, Mikelson J, Dobrzyński M, Jacques M-A, Frismantiene A, Gagliardi PA, Khammash M &  
1070 Pertz O (2021) Optogenetic actuator/biosensor circuits for large-scale interrogation of ERK dynamics  
1071 identify sources of MAPK signaling robustness. *bioRxiv*: 2021.07.27.453955  
1072 doi:10.1101/2021.07.27.453955 [PREPRINT]
- 1073 Dhawan NS, Scopton AP & Dar AC (2016) Small molecule stabilization of the KSR inactive state  
1074 antagonizes oncogenic Ras signalling. *Nature* 537: 112–116
- 1075 Ding K-F, Finlay D, Yin H, Hendricks WPD, Sereduk C, Kiefer J, Sekulic A, LoRusso PM, Vuori K,  
1076 Trent JM, *et al* (2018) Network Rewiring in Cancer: Applications to Melanoma Cell Lines and the  
1077 Cancer Genome Atlas Patients. *Front Genet* 9: 228
- 1078 English JM & Cobb MH (2002) Pharmacological inhibitors of MAPK pathways. *Trends Pharmacol Sci*  
1079 23: 40–45
- 1080 Evans MG & Polanyi M (1935) Some applications of the transition state method to the calculation of  
1081 reaction velocities, especially in solution. *Trans Faraday Soc* 31: 875–894
- 1082 Eydgahi H, Chen WW, Muhlich JL, Vitkup D, Tsitsiklis JN & Sorger PK (2013) Properties of cell death  
1083 models calibrated and compared using Bayesian approaches. *Mol Syst Biol* 9: 644
- 1084 Eyring H (1935) The Activated Complex in Chemical Reactions. *J Chem Phys* 3: 107–115
- 1085 Faeder JR, Blinov ML, Goldstein B & Hlavacek WS (2005) Combinatorial complexity and dynamical  
1086 restriction of network flows in signal transduction. *Syst Biol* 2: 5–15
- 1087 Fallahi-Sichani M, Becker V, Izar B, Baker GJ, Lin J, Boswell SA, Shah P, Rotem A, Garraway LA &  
1088 Sorger PK (2017) Adaptive resistance of melanoma cells to RAF inhibition via reversible induction of  
1089 a slowly dividing de-differentiated state. *Mol Syst Biol* 13
- 1090 Fitzgerald JB, Schoeberl B, Nielsen UB & Sorger PK (2006) Systems biology and combination therapy  
1091 in the quest for clinical efficacy. *Nat Chem Biol* 2: 458–66
- 1092 Flaherty KT, Infante JR, Daud A, Gonzalez R, Keefe RF, Sosman J, Hamid O, Schuchter L, Cebon J,  
1093 Ibrahim N, *et al* (2012) Combined BRAF and MEK Inhibition in Melanoma with BRAF V600  
1094 Mutations. *N Engl J Med* 367: 1694–1703
- 1095 Fröhlich F, Kaltenbacher B, Theis FJ & Hasenauer J (2017) Scalable parameter estimation for genome-  
1096 scale biochemical reaction networks. *PLoS Comput Biol* 13: 1–18
- 1097 Fröhlich F, Kessler T, Weindl D, Shadrin A, Schmiester L, Hache H, Muradyan A, Schütte M, Lim J-H,  
1098 Heinig M, *et al* (2018) Efficient Parameter Estimation Enables the Prediction of Drug Response Using  
1099 a Mechanistic Pan-Cancer Pathway Model. *Cell Syst* 7: 567-579.e6
- 1100 Fröhlich F, Loos C & Hasenauer J (2019) Scalable Inference of Ordinary Differential Equation Models of  
1101 Biochemical Processes. In *Gene Regulatory Networks: Methods and Protocols*, Sanguinetti G &  
1102 Huynh-Thu VA (eds) pp 385–422. New York, NY: Springer
- 1103 Fröhlich F & Sorger PK Fides: Reliable Trust-Region Optimization for Parameter Estimation of Ordinary  
1104 Differential Equation Models. *bioRxiv*
- 1105 Fröhlich F, Theis FJ & Hasenauer J (2014) Uncertainty analysis for non-identifiable dynamical systems:  
1106 Profile likelihoods, bootstrapping and more. In *Proceedings of the 12th International Conference on*  
1107 *Computational Methods in Systems Biology (CMSB 2014)*, Manchester, UK, Mendes P Dada JO &  
1108 Smallbone KO (eds) pp 61–72. Springer International Publishing Switzerland
- 1109 Fröhlich F, Thomas P, Kazeroonian A, Theis FJ, Grima R & Hasenauer J (2016) Inference for stochastic  
1110 chemical kinetics using moment equations and system size expansion. *PLoS Comput Biol* 12: e1005030



- 1111 Fröhlich F, Weindl D, Schälte Y, Pathirana D, Paszkowski Ł, Lines GT, Stapor P & Hasenauer J (2021)  
1112 AMICI: High-Performance Sensitivity Analysis for Large Ordinary Differential Equation Models.  
1113 *Bioinformatics* 37: 3676–3677
- 1114 Gao Y, Chang MT, McKay D, Na N, Zhou B, Yaeger R, Torres NM, Muniz K, Drosten M, Barbacid M,  
1115 *et al* (2018) Allele-Specific Mechanisms of Activation of MEK1 Mutants Determine Their Properties.  
1116 *Cancer Discov* 8: 648–661
- 1117 Gawthrop PJ & Crampin EJ (2017) Energy-based analysis of biomolecular pathways. *Proc R Soc Math*  
1118 *Phys Eng Sci* 473: 20160825
- 1119 Gerosa L, Chidley C, Fröhlich F, Sanchez G, Lim SK, Muhlich J, Chen J-Y, Vallabhaneni S, Baker GJ,  
1120 Schapiro D, *et al* (2020) Receptor-Driven ERK Pulses Reconfigure MAPK Signaling and Enable  
1121 Persistence of Drug-Adapted BRAF-Mutant Melanoma Cells. *Cell Syst* 11: 478-494.e9
- 1122 Goldbeter A & Koshland DE (1981) An amplified sensitivity arising from covalent modification in  
1123 biological systems. *Proc Natl Acad Sci U S A* 78: 6840–6844
- 1124 Gollub MG, Kaltenbach H-M & Stelling J (2021) Probabilistic thermodynamic analysis of metabolic  
1125 networks. *Bioinformatics* 37: 2938–2945
- 1126 Gutenkunst RN, Waterfall JJ, Casey FP, Brown KS, Myers CR & Sethna JP (2007) Universally sloppy  
1127 parameter sensitivities in systems biology models. *PLoS Comput Biol* 3: 1871–1878
- 1128 Haling JR, Sudhamsu J, Yen I, Sideris S, Sandoval W, Phung W, Bravo BJ, Giannetti AM, Peck A,  
1129 Masselot A, *et al* (2014) Structure of the BRAF-MEK Complex Reveals a Kinase Activity Independent  
1130 Role for BRAF in MAPK Signaling. *Cancer Cell* 26: 402–413
- 1131 Hall-Jackson CA, Eyers PA, Cohen P, Goedert M, Tom Boyle F, Hewitt N, Plant H & Hedge P (1999)  
1132 Paradoxical activation of Raf by a novel Raf inhibitor. *Chem Biol* 6: 559–568
- 1133 Harris LA, Hogg JS, Tapia J-J, Sekar JAP, Gupta S, Korsunsky I, Arora A, Barua D, Sheehan RP & Faeder  
1134 JR (2016) BioNetGen 2.2: advances in rule-based modeling. *Bioinforma Oxf Engl* 32: 3366–3368
- 1135 Hatzivassiliou G, Haling JR, Chen H, Song K, Price S, Heald R, Hewitt JFM, Zak M, Peck A, Orr C, *et*  
1136 *al* (2013) Mechanism of MEK inhibition determines efficacy in mutant KRAS- versus BRAF-driven  
1137 cancers. *Nature* 501: 232–236
- 1138 Hatzivassiliou G, Song K, Yen I, Brandhuber BJ, Anderson DJ, Alvarado R, Ludlam MJC, Stokoe D,  
1139 Gloor SL, Vigers G, *et al* (2010) RAF inhibitors prime wild-type RAF to activate the MAPK pathway  
1140 and enhance growth. *Nature* 464: 431–435
- 1141 Henry JR, Kaufman MD, Peng S-B, Ahn YM, Caldwell TM, Vogeti L, Telikepalli H, Lu W-P, Hood MM,  
1142 Rutkoski TJ, *et al* (2015) Discovery of 1-(3,3-Dimethylbutyl)-3-(2-fluoro-4-methyl-5-(7-methyl-2-  
1143 (methylamino)pyrido[2,3-d]pyrimidin-6-yl)phenyl)urea (LY3009120) as a Pan-RAF Inhibitor with  
1144 Minimal Paradoxical Activation and Activity against BRAF or RAS Mutant Tumor Cells. *J Med Chem*  
1145 58: 4165–4179
- 1146 Hlavacek WS, Faeder JR, Blinov ML, Posner RG, Hucka M & Fontana W (2006) Rules for Modeling  
1147 Signal-Transduction Systems. *Sci STKE* 2006
- 1148 Hogg JS (2013) Advances in Rule-based Modeling: Compartments, Energy, and Hybrid Simulation, with  
1149 Application to Sepsis and Cell Signaling. *undefined*
- 1150 Honorato-Zimmer R, Harmer R & Danos V (2015) Thermodynamic graph-rewriting. *Log Methods*  
1151 *Comput Sci* Volume 11, Issue 2
- 1152 Hunter T (2000) Signaling--2000 and beyond. *Cell* 100: 113–127
- 1153 Hyttinen A, Eberhardt F & Hoyer PO (2012) Learning Linear Cyclic Causal Models with Latent Variables.  
1154 *J Mach Learn Res* 13: 3387–3439
- 1155 Jumper J, Evans R, Pritzel A, Green T, Figurnov M, Ronneberger O, Tunyasuvunakool K, Bates R, Židek  
1156 A, Potapenko A, *et al* (2021) Highly accurate protein structure prediction with AlphaFold. *Nature*: 1–  
1157 11

- 1158 Kamioka Y, Yasuda S, Fujita Y, Aoki K & Matsuda M (2010) Multiple Decisive Phosphorylation Sites  
1159 for the Negative Feedback Regulation of SOS1 via ERK \*. *J Biol Chem* 285: 33540–33548
- 1160 Karoulia Z, Gavathiotis E & Poulikakos PI (2017) New perspectives for targeting RAF kinase in human  
1161 cancer. *Nat Rev Cancer* 17: 676–691
- 1162 Karoulia Z, Wu Y, Ahmed TA, Xin Q, Bollard J, Krepler C, Wu X, Zhang C, Bollag G, Herlyn M, *et al*  
1163 (2016) An Integrated Model of RAF Inhibitor Action Predicts Inhibitor Activity against Oncogenic  
1164 BRAF Signaling. *Cancer Cell* 30: 485–498
- 1165 Kebebew E, Weng J, Bauer J, Ranvier G, Clark OH, Duh Q-Y, Shibru D, Bastian B & Griffin A (2007)  
1166 The Prevalence and Prognostic Value of BRAF Mutation in Thyroid Cancer. *Ann Surg* 246: 466–471
- 1167 Kholodenko BN (2015) Drug Resistance Resulting from Kinase Dimerization Is Rationalized by  
1168 Thermodynamic Factors Describing Allosteric Inhibitor Effects. *Cell Rep* 12: 1939–1949
- 1169 Kholodenko BN, Demin OV, Moehren G & Hoek JB (1999) Quantification of Short Term Signaling by  
1170 the Epidermal Growth Factor Receptor. *J Biol Chem* 274: 30169–30181
- 1171 Kiyatkin A, Rosenburgh IK van A van, Klein DE & Lemmon MA (2020) Kinetics of receptor tyrosine  
1172 kinase activation define ERK signaling dynamics. *Sci Signal* 13
- 1173 Kleiman LB, Maiwald T, Conzelmann H, Lauffenburger DA & Sorger PK (2011) Rapid phospho-turnover  
1174 by receptor tyrosine kinases impacts downstream signaling and drug binding. *Mol Cell* 43: 723–737
- 1175 Klosin A, Oltsch F, Harmon T, Honigsmann A, Jülicher F, Hyman AA & Zechner C (2020) Phase  
1176 separation provides a mechanism to reduce noise in cells. *Science* 367: 464–468
- 1177 Kreutz C, Raue A & Timmer J (2012) Likelihood based observability analysis and confidence intervals  
1178 for predictions of dynamic models. *BMC Syst Biol* 6
- 1179 Lao D-H, Chandramouli S, Yusoff P, Fong CW, Saw TY, Tai LP, Yu CY, Leong HF & Guy GR (2006)  
1180 A Src Homology 3-binding Sequence on the C Terminus of Sprouty2 Is Necessary for Inhibition of the  
1181 Ras/ERK Pathway Downstream of Fibroblast Growth Factor Receptor Stimulation \*. *J Biol Chem* 281:  
1182 29993–30000
- 1183 Lavoie H, Gagnon J & Therrien M (2020) ERK signalling: a master regulator of cell behaviour, life and  
1184 fate. *Nat Rev Mol Cell Biol* 21: 607–632
- 1185 Lavoie H & Therrien M (2015) Regulation of RAF protein kinases in ERK signalling. *Nat Rev Mol Cell*  
1186 *Biol* 16: 281–298
- 1187 Lee MJ, Ye AS, Gardino AK, Heijink AM, Sorger PK, MacBeath G & Yaffe MB (2012) Sequential  
1188 application of anticancer drugs enhances cell death by rewiring apoptotic signaling networks. *Cell* 149:  
1189 780–794
- 1190 Lehár J, Krueger AS, Avery W, Heilbut AM, Johansen LM, Price ER, Rickles RJ, Short Iii GF, Staunton  
1191 JE, Jin X, *et al* (2009) Synergistic drug combinations tend to improve therapeutically relevant  
1192 selectivity. *Nat Biotechnol* 27: 659–666
- 1193 Lehár J, Zimmermann GR, Krueger AS, Molnar RA, Ledell JT, Heilbut AM, Short GF, Giusti LC, Nolan  
1194 GP, Magid OA, *et al* (2007) Chemical combination effects predict connectivity in biological systems.  
1195 *Mol Syst Biol* 3
- 1196 Lemmon MA & Schlessinger J (2010) Cell signaling by receptor-tyrosine kinases. *Cell* 141: 1117–1134
- 1197 Lito P, Pratilas CA, Joseph EW, Tadi M, Halilovic E, Zubrowski M, Huang A, Wong WL, Callahan MK,  
1198 Merghoub T, *et al* (2012) Relief of Profound Feedback Inhibition of Mitogenic Signaling by RAF  
1199 Inhibitors Attenuates their Activity in BRAFV600E Melanomas. *Cancer Cell* 22: 668–682
- 1200 Lito P, Rosen N & Solit DB (2013) Tumor adaptation and resistance to RAF inhibitors. *Nat Med* 19: 1401
- 1201 Lito P, Saborowski A, Yue J, Solomon M, Joseph E, Gadal S, Saborowski M, Kasthuber E, Fellmann  
1202 C, Ohara K, *et al* (2014) Disruption of CRAF-Mediated MEK Activation Is Required for Effective  
1203 MEK Inhibition in KRAS Mutant Tumors. *Cancer Cell* 25: 697–710
- 1204 Loewe S (1928) Die quantitativen Probleme der Pharmakologie. *Ergeb Physiol* 27: 47–187

- 1205 Long GV, Fung C, Menzies AM, Pupo GM, Carlino MS, Hyman J, Shahheydari H, Tembe V, Thompson  
1206 JF, Saw RP, *et al* (2014) Increased MAPK reactivation in early resistance to dabrafenib/trametinib  
1207 combination therapy of BRAF-mutant metastatic melanoma. *Nat Commun* 5: 1–9
- 1208 Lopez CF, Muhlich JL, Bachman JA & Sorger PK (2013) Programming biological models in Python using  
1209 PySB. *Mol Syst Biol* 9: 646
- 1210 Lund KA, Opresko LK, Starbuck C, Walsh BJ & Wiley HS (1990) Quantitative analysis of the endocytic  
1211 system involved in hormone-induced receptor internalization. *J Biol Chem* 265: 15713–15723
- 1212 Marin-Bejar O, Rogiers A, Dewaele M, Femel J, Karras P, Pozniak J, Bervoets G, Raemdonck NV, Pedri  
1213 D, Swings T, *et al* (2021) Evolutionary predictability of genetic versus nongenetic resistance to  
1214 anticancer drugs in melanoma. *Cancer Cell* 39: 1135-1149.e8
- 1215 Mason JC & Covert MW (2018) An energetic reformulation of kinetic rate laws enables scalable  
1216 parameter estimation for biochemical networks. *J Theor Biol*
- 1217 Mooij JM, Janzing D & Schölkopf B (2013) From Ordinary Differential Equations to Structural Causal  
1218 Models: the deterministic case. *ArXiv13047920 Cs Stat*
- 1219 Noeparast A, Giron P, De Brakeleer S, Eggermont C, De Ridder U, Teugels E & De Grève J (2018) Type  
1220 II RAF inhibitor causes superior ERK pathway suppression compared to type I RAF inhibitor in cells  
1221 expressing different BRAF mutant types recurrently found in lung cancer. *Oncotarget* 9: 16110–16123
- 1222 Nusinow DP, Szpyt J, Ghandi M, Rose CM, McDonald ER, Kalocsay M, Jané-Valbuena J, Gelfand E,  
1223 Schweppe DK, Jedrychowski M, *et al* (2020) Quantitative Proteomics of the Cancer Cell Line  
1224 Encyclopedia. *Cell* 180: 387-402.e16
- 1225 Olivier BG, Rohwer JM & Hofmeyr J-HS (2005) Modelling cellular systems with PySCeS. *Bioinf* 21:  
1226 560–561
- 1227 Ollivier JF, Shahrezaei V & Swain PS (2010) Scalable Rule-Based Modelling of Allosteric Proteins and  
1228 Biochemical Networks. *PLOS Comput Biol* 6: e1000975
- 1229 Oren Y, Tsabar M, Cuoco MS, Amir-Zilberstein L, Cabanos HF, Hütter J-C, Hu B, Thakore PI, Tabaka  
1230 M, Fulco CP, *et al* (2021) Cycling cancer persister cells arise from lineages with distinct programs.  
1231 *Nature* 596: 576–582
- 1232 Pearl J & Dechter R (2013) Identifying Independencies in Causal Graphs with Feedback. *ArXiv13023595*  
1233 *Cs*
- 1234 Peng S-B, Henry JR, Kaufman MD, Lu W-P, Smith BD, Vogeti S, Rutkoski TJ, Wise S, Chun L, Zhang  
1235 Y, *et al* (2015) Inhibition of RAF Isoforms and Active Dimers by LY3009120 Leads to Anti-tumor  
1236 Activities in RAS or BRAF Mutant Cancers. *Cancer Cell* 28: 384–398
- 1237 Pino GLG-D, Li K, Park E, Schmoker AM, Ha BH & Eck MJ (2021) Allosteric MEK inhibitors act on  
1238 BRAF/MEK complexes to block MEK activation. *Proc Natl Acad Sci* 118
- 1239 Poulidakos PI, Persaud Y, Janakiraman M, Kong X, Ng C, Moriceau G, Shi H, Atefi M, Titz B, Gabay  
1240 MT, *et al* (2011) RAF inhibitor resistance is mediated by dimerization of aberrantly spliced  
1241 BRAF(V600E). *Nature* 480: 387–390
- 1242 Poulidakos PI, Zhang C, Bollag G, Shokat KM & Rosen N (2010) RAF inhibitors transactivate RAF  
1243 dimers and ERK signalling in cells with wild-type BRAF. *Nature* 464: 427–430
- 1244 Pratilas CA, Taylor BS, Ye Q, Viale A, Sander C, Solit DB & Rosen N (2009) (V600E)BRAF is associated  
1245 with disabled feedback inhibition of RAF-MEK signaling and elevated transcriptional output of the  
1246 pathway. *Proc Natl Acad Sci U S A* 106: 4519–4524
- 1247 Prior IA, Lewis PD & Mattos C (2012) A Comprehensive Survey of Ras Mutations in Cancer. *Cancer*  
1248 *Res* 72: 2457–2467
- 1249 Raue A, Kreutz C, Maiwald T, Klingmüller U & Timmer J (2011) Addressing parameter identifiability  
1250 by model-based experimentation. *IET Syst Biol* 5: 120–130
- 1251 Reddy RJ, Gajadhar AS, Swenson EJ, Rothenberg DA, Curran TG & White FM (2016) Early signaling  
1252 dynamics of the epidermal growth factor receptor. *Proc Natl Acad Sci* 113: 3114–3119

- 1253 Resat H, Ewald JA, Dixon DA & Wiley HS (2003) An Integrated Model of Epidermal Growth Factor  
1254 Receptor Trafficking and Signal Transduction. *Biophys J* 85: 730–743
- 1255 Roskoski R (2016) Classification of small molecule protein kinase inhibitors based upon the structures of  
1256 their drug-enzyme complexes. *Pharmacol Res* 103: 26–48
- 1257 Rukhlenko OS, Khorsand F, Krstic A, Rozanc J, Alexopoulos LG, Rauch N, Erickson KE, Hlavacek WS,  
1258 Posner RG, Gómez-Coca S, *et al* (2018) Dissecting RAF Inhibitor Resistance by Structure-based  
1259 Modeling Reveals Ways to Overcome Oncogenic RAS Signaling. *Cell Syst* 7: 161-179.e14
- 1260 Russo M, Crisafulli G, Sogari A, Reilly NM, Arena S, Lamba S, Bartolini A, Amodio V, Magri A, Novara  
1261 L, *et al* (2019) Adaptive mutability of colorectal cancers in response to targeted therapies. *Science* 366:  
1262 1473–1480
- 1263 Samatar AA & Poulikakos PI (2014) Targeting RAS–ERK signalling in cancer: promises and challenges.  
1264 *Nat Rev Drug Discov* 13: 928–942
- 1265 Sanchez-Vega F, Mina M, Armenia J, Chatila WK, Luna A, La KC, Dimitriadoy S, Liu DL, Kantheti HS,  
1266 Saghafinia S, *et al* (2018) Oncogenic Signaling Pathways in The Cancer Genome Atlas. *Cell* 173: 321-  
1267 337.e10
- 1268 Sauro HM (2008) Modularity defined. *Mol Syst Biol* 4: 166
- 1269 Schöberl B, Pace EA, Fitzgerald JB, Harms BD, Xu L, Nie L, Linggi B, Kalra A, Paragas V, Bukhalid R,  
1270 *et al* (2009) Therapeutically targeting ErbB3: A key node in ligand-induced activation of the ErbB  
1271 receptor-PI3K axis. *Sci Signal* 2: ra31
- 1272 Schuh L, Saint-Antoine M, Sanford EM, Emert BL, Singh A, Marr C, Raj A & Goyal Y (2020) Gene  
1273 Networks with Transcriptional Bursting Recapitulate Rare Transient Coordinated High Expression  
1274 States in Cancer. *Cell Syst* 10: 363-378.e12
- 1275 Sekar JAP, Hogg JS & Faeder JR (2016) Energy-based modeling in BioNetGen. In *2016 IEEE*  
1276 *International Conference on Bioinformatics and Biomedicine (BIBM)* pp 1460–1467.
- 1277 Shaffer SM, Dunagin MC, Torborg SR, Torre EA, Emert B, Krepler C, Beqiri M, Sproesser K, Brafford  
1278 PA, Xiao M, *et al* (2017) Rare cell variability and drug-induced reprogramming as a mode of cancer  
1279 drug resistance. *Nature* 546: 431–435
- 1280 Sharp R, Pyarelal A, Gyori B, Alcock K, Laparra E, Valenzuela-Escárcega MA, Nagesh A, Yadav V,  
1281 Bachman J, Tang Z, *et al* (2019) Eidos, INDRA, & Delphi: From Free Text to Executable Causal  
1282 Models. In *Proceedings of the 2019 Conference of the North American Chapter of the Association for*  
1283 *Computational Linguistics (Demonstrations)* pp 42–47. Minneapolis, Minnesota: Association for  
1284 Computational Linguistics
- 1285 Shi H, Hugo W, Kong X, Hong A, Koya RC, Moriceau G, Chodon T, Guo R, Johnson DB, Dahlman KB,  
1286 *et al* (2014) Acquired resistance and clonal evolution in melanoma during BRAF inhibitor therapy.  
1287 *Cancer Discov* 4: 80–93
- 1288 Sneddon MW, Faeder JR & Emonet T (2011) Efficient modeling, simulation and coarse-graining of  
1289 biological complexity with NFsim. *Nat Methods* 8: 177–183
- 1290 Solit DB, Garraway LA, Pratilas CA, Sawai A, Getz G, Basso A, Ye Q, Lobo JM, She Y, Osman I, *et al*  
1291 (2006) BRAF mutation predicts sensitivity to MEK inhibition. *Nature* 439: 358–362
- 1292 de Souza N & Picotti P (2020) Mass spectrometry analysis of the structural proteome. *Curr Opin Struct*  
1293 *Biol* 60: 57–65
- 1294 Spirtes PL (2013) Directed Cyclic Graphical Representations of Feedback Models. *ArXiv13024982 Cs*
- 1295 Städter P, Schälte Y, Schmiester L, Hasenauer J & Stapor PL (2021) Benchmarking of numerical  
1296 integration methods for ODE models of biological systems. *Sci Rep* 11: 2696
- 1297 Stapor P, Weindl D, Ballnus B, Hug S, Loos C, Fiedler A, Krause S, Hroß S, Fröhlich F & Hasenauer J  
1298 (2018) PESTO: Parameter ESTimation TToolbox. *Bioinforma Oxf Engl* 34: 705–707
- 1299 Starbuck C & Lauffenburger DA (1992) Mathematical model for the effects of epidermal growth factor  
1300 receptor trafficking dynamics on fibroblast proliferation responses. *Biotechnol Prog* 8: 132–143



- 1301 Sullivan RJ & Flaherty K (2012) MAP kinase signaling and inhibition in melanoma. *Oncogene* 32: 2373  
1302 Tsai C-J & Nussinov R (2014) A Unified View of “How Allostery Works”. *PLOS Comput Biol* 10:  
1303 e1003394  
1304 Tutuka CSA, Andrews MC, Mariadason JM, Ioannidis P, Hudson C, Cebon J & Behren A (2017)  
1305 PLX8394, a new generation BRAF inhibitor, selectively inhibits BRAF in colonic adenocarcinoma  
1306 cells and prevents paradoxical MAPK pathway activation. *Mol Cancer* 16: 112  
1307 Ullrich A & Schlessinger J (1990) Signal transduction by receptors with tyrosine kinase activity. *Cell* 61:  
1308 203–212  
1309 Villaverde AF, Fröhlich F, Weindl D, Hasenauer J & Banga JR (2019) Benchmarking optimization  
1310 methods for parameter estimation in large kinetic models. *Bioinformatics* 35: 830–838  
1311 Wagle N, Emery C, Berger MF, Davis MJ, Sawyer A, Pochanard P, Kehoe SM, Johannessen CM,  
1312 MacConaill LE, Hahn WC, *et al* (2011) Dissecting Therapeutic Resistance to RAF Inhibition in  
1313 Melanoma by Tumor Genomic Profiling. *J Clin Oncol* 29: 3085–3096  
1314 Wegscheider R (1911) Über simultane Gleichgewichte und die Beziehungen zwischen Thermodynamik  
1315 und Reaktionskinetik homogener Systeme. *Monatshefte Für Chem Verwandte Teile Anderer Wiss* 32:  
1316 849–906  
1317 Wei Q, Qian Y, Yu J & Wong CC (2020) Metabolic rewiring in the promotion of cancer metastasis:  
1318 mechanisms and therapeutic implications. *Oncogene* 39: 6139–6156  
1319 Wieland F-G, Hauber AL, Rosenblatt M, Tönsing C & Timmer J (2021) On structural and practical  
1320 identifiability. *Curr Opin Syst Biol* 25: 60–69  
1321 Wiley HS (1988) Anomalous binding of epidermal growth factor to A431 cells is due to the effect of high  
1322 receptor densities and a saturable endocytic system. *J Cell Biol* 107: 801–810  
1323 Wu P-K & Park J-I (2015) MEK1/2 Inhibitors: Molecular Activity and Resistance Mechanisms. *Semin*  
1324 *Oncol* 42: 849–862  
1325 Yao Z, Gao Y, Su W, Yaeger R, Tao J, Na N, Zhang Y, Zhang C, Rymar A, Tao A, *et al* (2019) RAF  
1326 inhibitor PLX8394 selectively disrupts BRAF dimers and RAS-independent BRAF-mutant-driven  
1327 signaling. *Nat Med* 25: 284–291  
1328 Yao Z, Torres NM, Tao A, Gao Y, Luo L, Li Q, de Stanchina E, Abdel-Wahab O, Solit DB, Poulikakos  
1329 PI, *et al* (2015) BRAF Mutants Evade ERK-Dependent Feedback by Different Mechanisms that  
1330 Determine Their Sensitivity to Pharmacologic Inhibition. *Cancer Cell* 28: 370–383  
1331 Yen I, Shanahan F, Lee J, Hong YS, Shin SJ, Moore AR, Sudhamsu J, Chang MT, Bae I, Dela Cruz D, *et*  
1332 *al* (2021) ARAF mutations confer resistance to the RAF inhibitor belvarafenib in melanoma. *Nature*  
1333 594: 418–423  
1334 Yen I, Shanahan F, Merchant M, Orr C, Hunsaker T, Durk M, La H, Zhang X, Martin SE, Lin E, *et al*  
1335 (2018) Pharmacological Induction of RAS-GTP Confers RAF Inhibitor Sensitivity in KRAS Mutant  
1336 Tumors. *Cancer Cell* 34: 611-625.e7  
1337 Yin N, Ma W, Pei J, Ouyang Q, Tang C & Lai L (2014) Synergistic and Antagonistic Drug Combinations  
1338 Depend on Network Topology. *PLOS ONE* 9: e93960  
1339 Yuan B, Shen C, Luna A, Korkut A, Marks DS, Ingraham J & Sander C (2020) CellBox: Interpretable  
1340 Machine Learning for Perturbation Biology with Application to the Design of Cancer Combination  
1341 Therapy. *Cell Syst*  
1342 Zhang C, Spevak W, Zhang Y, Burton EA, Ma Y, Habets G, Zhang J, Lin J, Ewing T, Matusow B, *et al*  
1343 (2015) RAF inhibitors that evade paradoxical MAPK pathway activation. *Nature* 526: 583–586  
1344

1345

1346 **FIGURES AND THEIR LEGENDS**

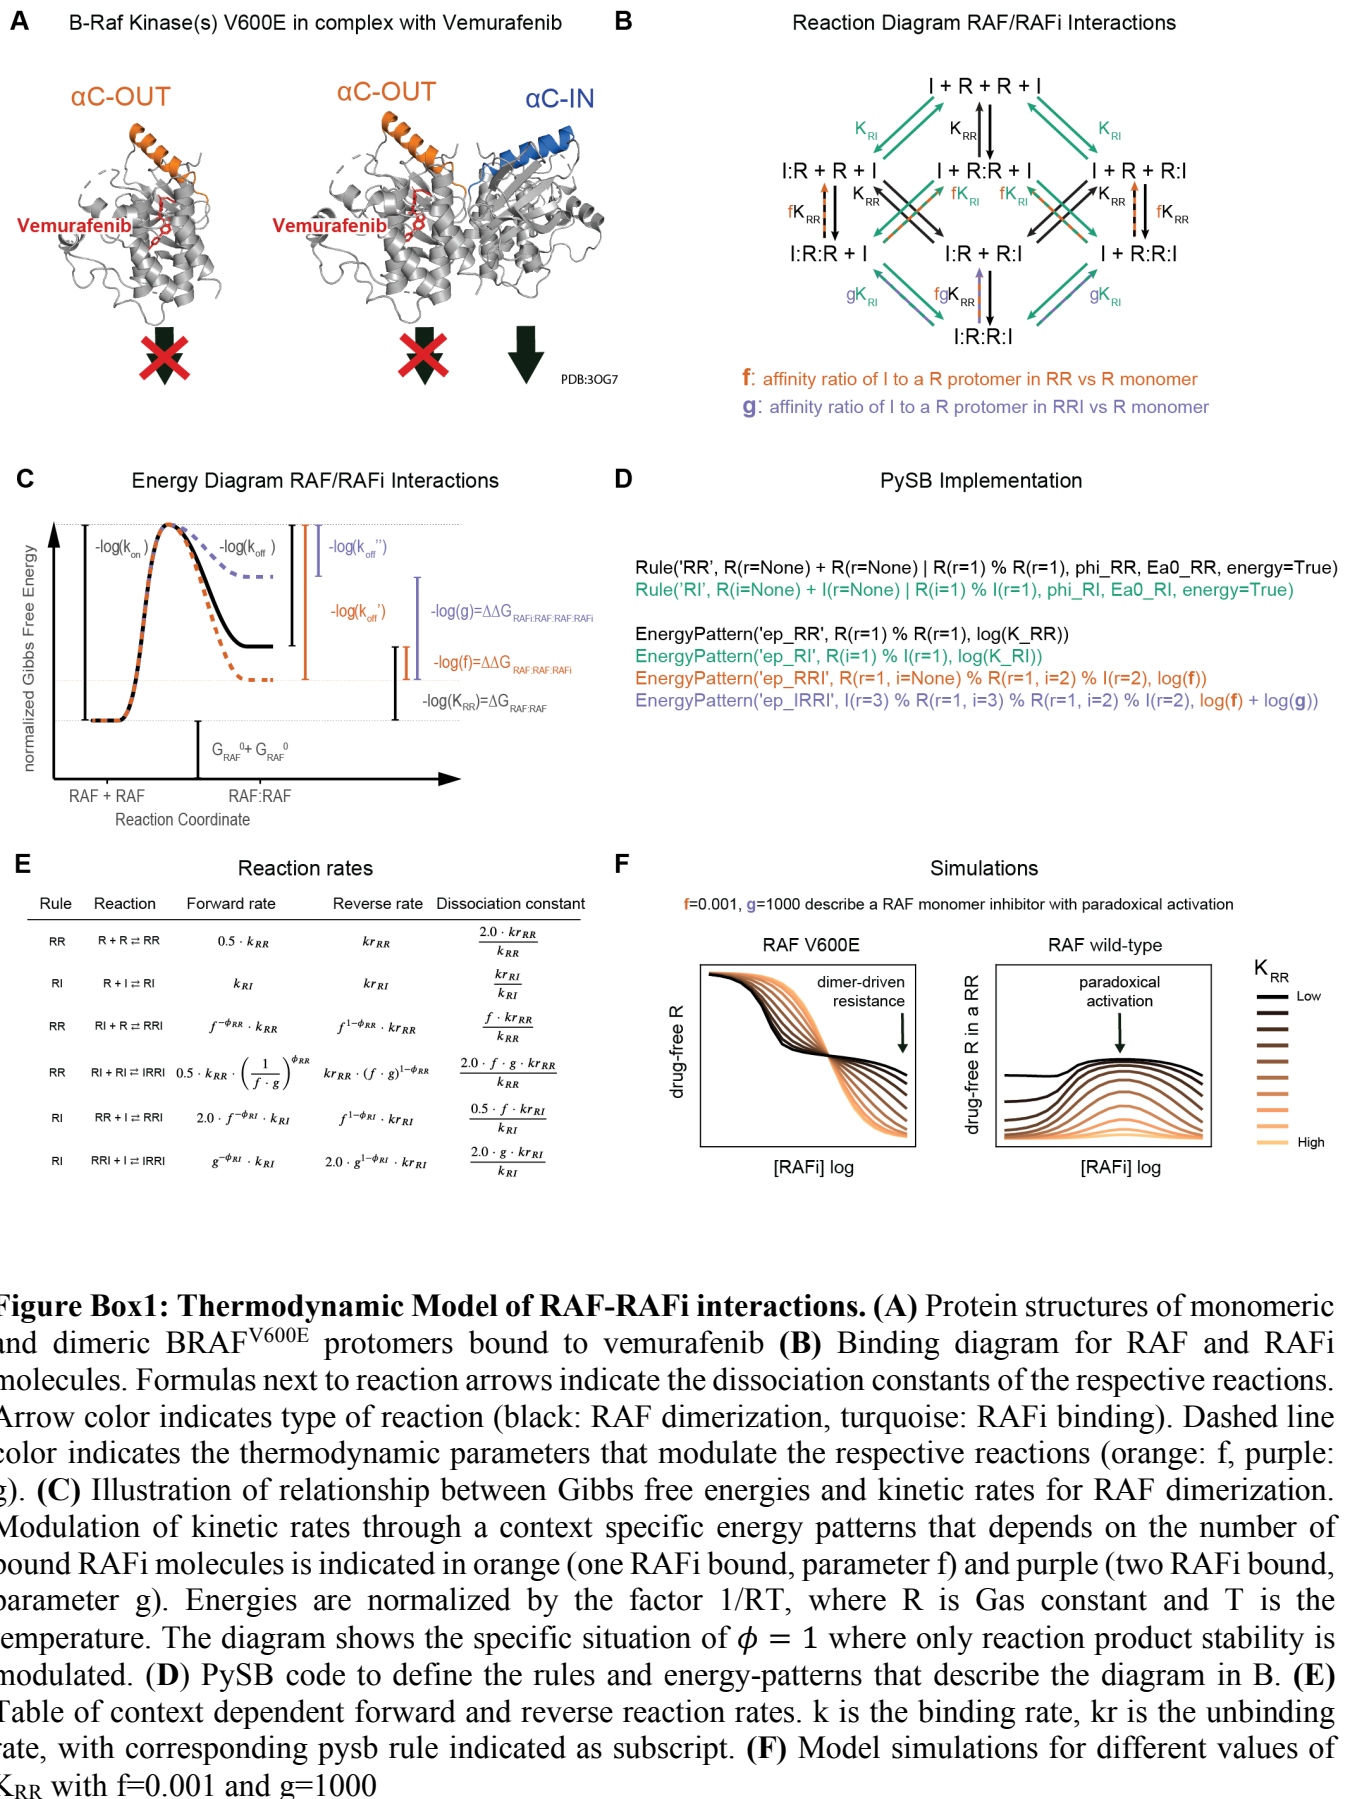

1347

1348 **Figure Box1: Thermodynamic Model of RAF-RAFi interactions.** (A) Protein structures of monomeric  
 1349 and dimeric BRAF<sup>V600E</sup> protomers bound to vemurafenib (B) Binding diagram for RAF and RAFi  
 1350 molecules. Formulas next to reaction arrows indicate the dissociation constants of the respective reactions.  
 1351 Arrow color indicates type of reaction (black: RAF dimerization, turquoise: RAFi binding). Dashed line  
 1352 color indicates the thermodynamic parameters that modulate the respective reactions (orange: f, purple:  
 1353 g). (C) Illustration of relationship between Gibbs free energies and kinetic rates for RAF dimerization.  
 1354 Modulation of kinetic rates through a context specific energy patterns that depends on the number of  
 1355 bound RAFi molecules is indicated in orange (one RAFi bound, parameter f) and purple (two RAFi bound,  
 1356 parameter g). Energies are normalized by the factor 1/RT, where R is Gas constant and T is the  
 1357 temperature. The diagram shows the specific situation of  $\phi = 1$  where only reaction product stability is  
 1358 modulated. (D) PySB code to define the rules and energy-patterns that describe the diagram in B. (E)  
 1359 Table of context dependent forward and reverse reaction rates. k is the binding rate, kr is the unbinding  
 1360 rate, with corresponding pysb rule indicated as subscript. (F) Model simulations for different values of  
 1361  $K_{RR}$  with  $f=0.001$  and  $g=1000$





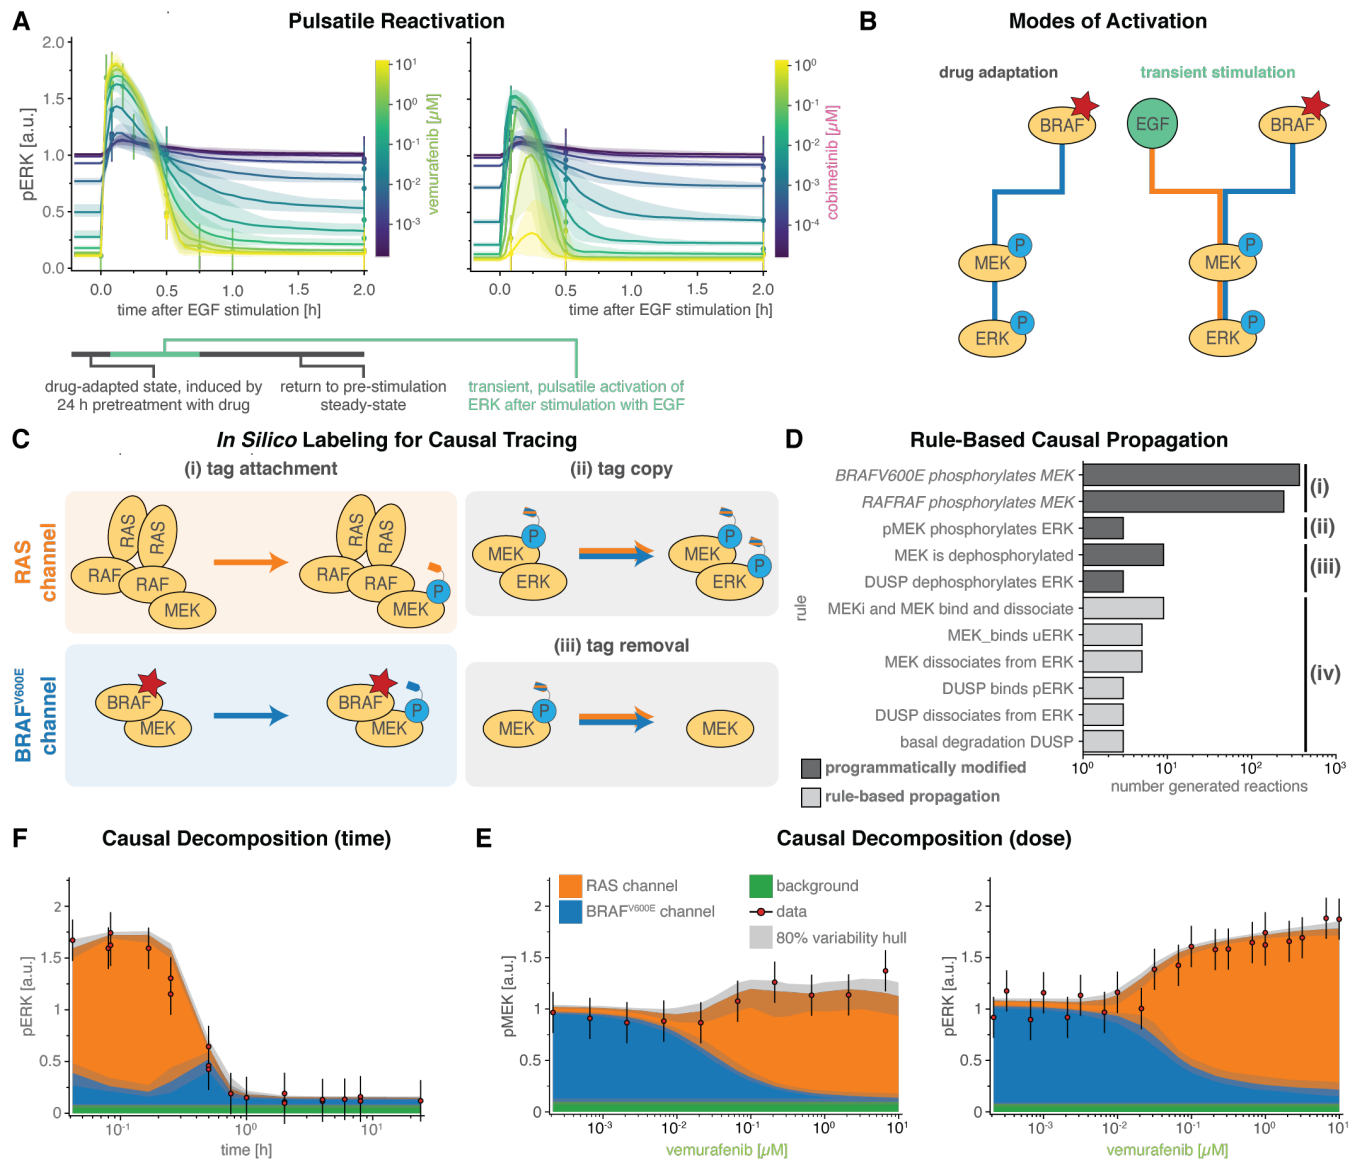

**Figure 2: Causal Decomposition of RAS and BRAF<sup>V600E</sup> Channels.** (A) Time course of pre- and post-stimulation pERK levels. Model simulations are shown as solid lines, experimental data as vertical point-ranges. Colors indicate different concentrations of vemurafenib (RAFi) and cobimetinib (MEKi). Shading shows 80% percentiles over parameter sets. (B) Toggling of modes activation for pMEK via BRAF<sup>V600E</sup> (blue) and EGF (orange) during the two phases of pulsatile reactivation shown in A: drug adaptation (left) and transient stimulation (right) (C) Schematic for tracing of causal history using synthetic sites. (D) Rules affected by causal decomposition (E, F) Comparison of experimental data and decomposed model simulations at 5 minutes after EGF stimulation. Data is shown as point-ranges. Median (over parameter sets) simulations are shown as stacked areas with color indicating reaction channel (blue: BRAF<sup>V600E</sup>, orange: RAS). Shading indicates 80% percentiles over parameter sets.

1374

1375

1376

1377

1378

1379

1380

1381

1382

1383

1384

1385

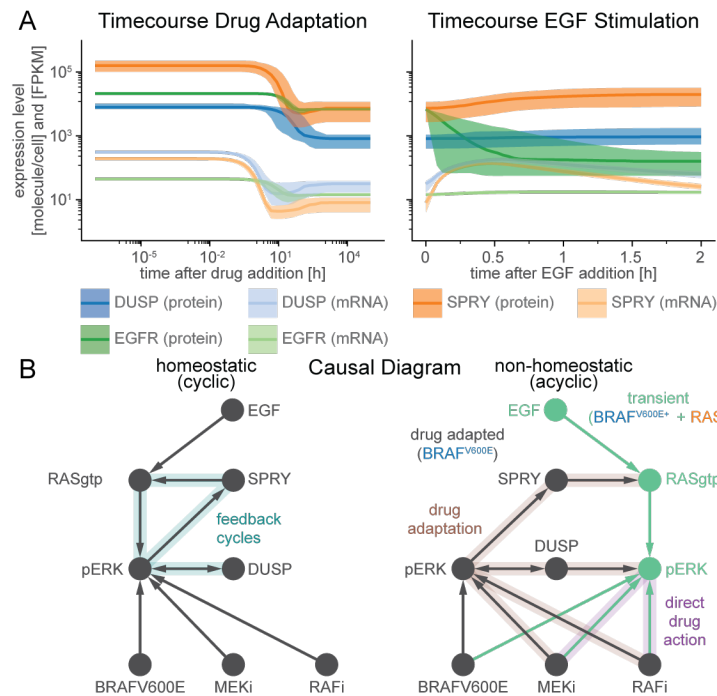

1386

1387 **Figure 3: Transcriptional feedbacks imprint a sparse drug-adapted state.** (A) Time Courses of pre-  
 1388 (left) and post-stimulation (right) protein (dark colors) and mRNA (light colors) expression levels of genes  
 1389 that are subject to transcriptional control by pERK. (B) Schematic of the structural causal model for the  
 1390 effect of RAFi and MEKi on pERK under homeostatic (left) and non-homeostatic (right) conditions.

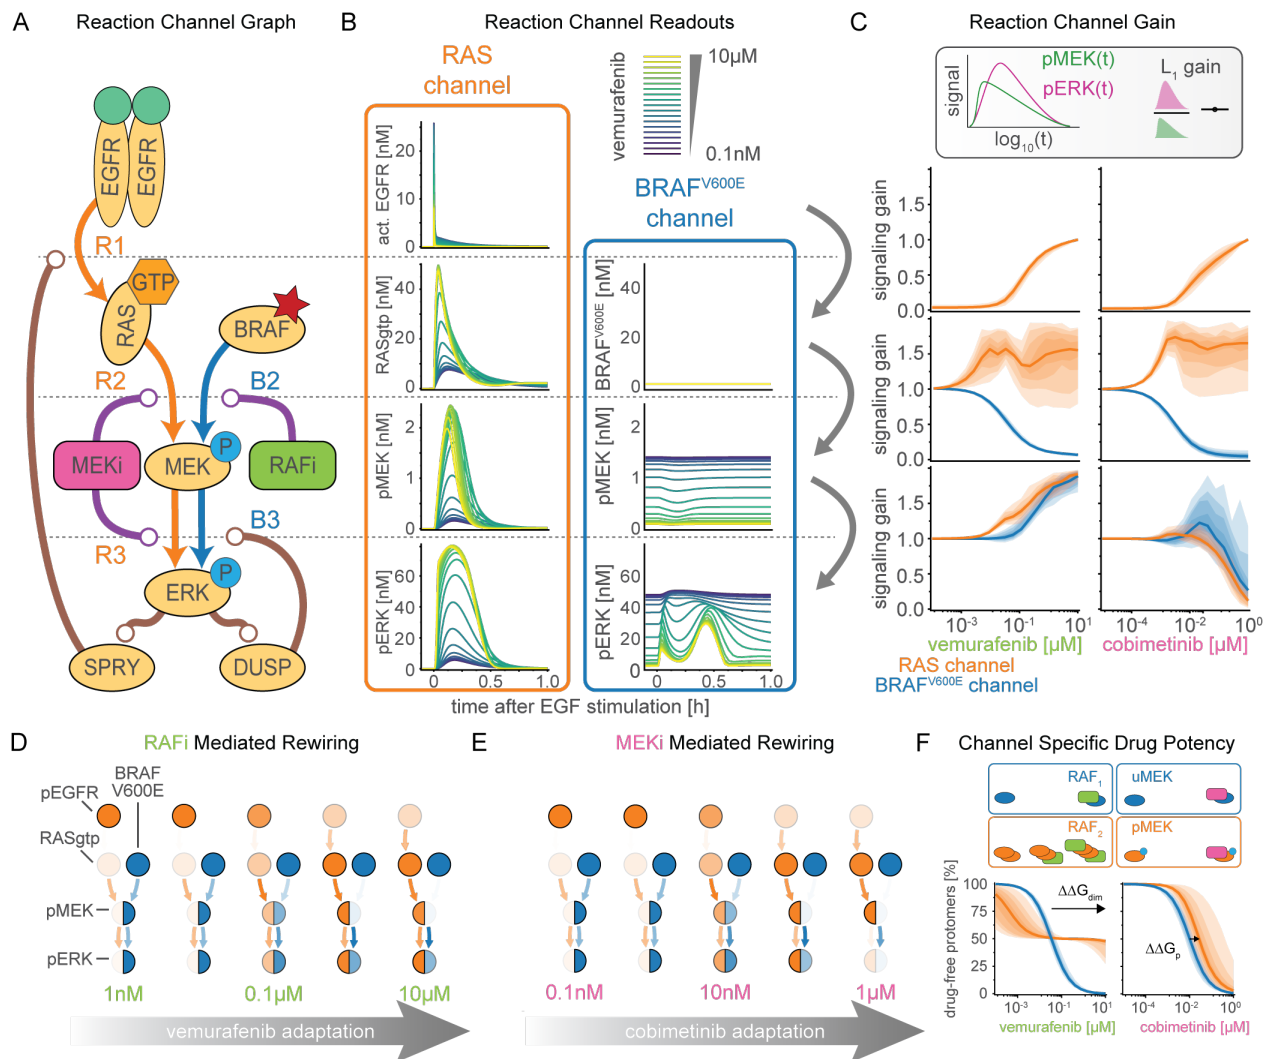

1391

1392 **Figure 4: Quantification of signal transduction in RAS and BRAF<sup>V600E</sup> channels.** (A) Simplified  
 1393 model network depicting intertwined RAS and BRAF<sup>V600E</sup> channels and feedbacks. (B) Decomposition  
 1394 of RAS and BRAF<sup>V600E</sup> signals at the different nodes of the simplified network from A for different  
 1395 concentrations of vemurafenib. Color indicates vemurafenib concentration. Simulations were performed  
 1396 for a representative parameter value. (C) Quantification of signal transmissions in terms of signaling gain  
 1397 along the edges of the simplified network in A for different concentrations of vemurafenib (left) and  
 1398 cobimetinib (right). Color indicates the reaction channel. Shading indicates 20%, 40% 60% and 80%  
 1399 percentiles over parameter sets. (D, E) Visualization of pathway rewiring as a result of drug adaptation.  
 1400 Opacity of nodes indicates median normalized signaling activity (shown in B). Opacity of arrows indicates  
 1401 median normalized signaling gain (shown in C) where 100% corresponds to a signaling gain of 2. (F)  
 1402 Quantification of efficacy of drug inhibition. For RAF dimers, each protomer is counted individually.  
 1403 Shading indicates 20%, 40% 60% and 80% percentiles over parameter sets.

1404

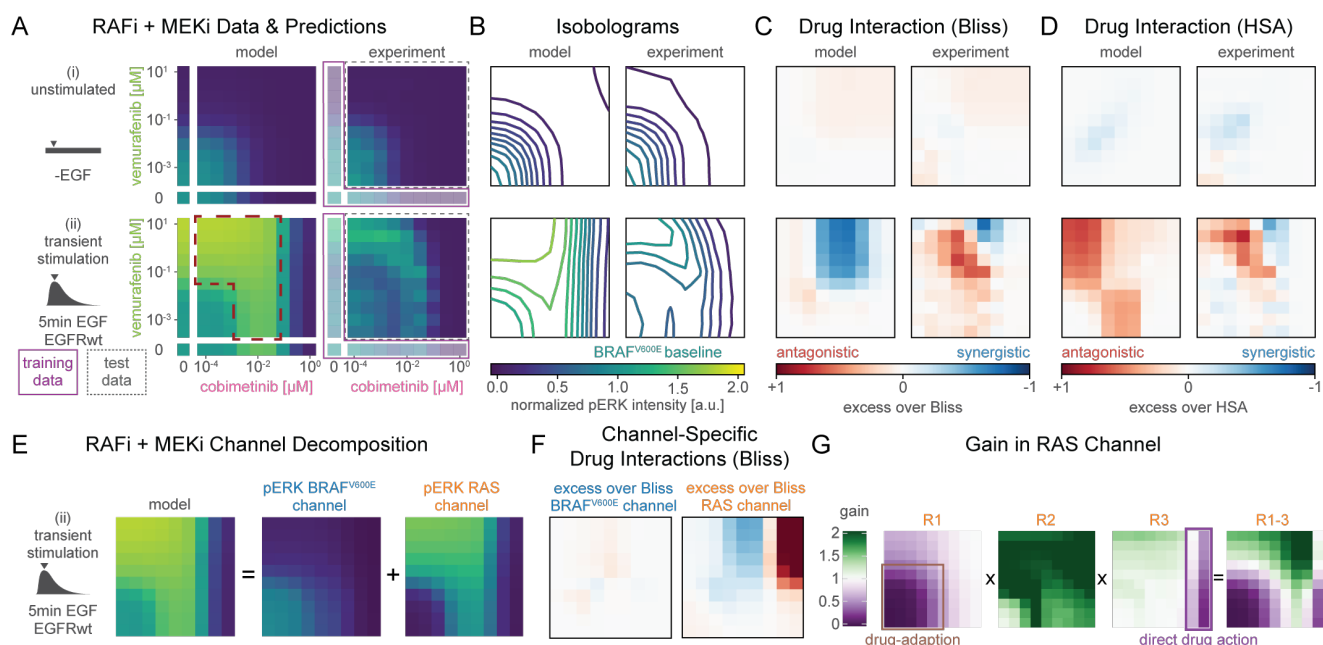

1405

1406 **Figure 5: Prediction and analysis of drug combinations.** (A) Experimental data and model simulations  
 1407 for ERK combination response without EGF stimulation (top) and 5 min after EGF stimulation (bottom).  
 1408 Training data has lower opacity and purple outline. Test data has a grey, dashed outline. (B) Isobolograms  
 1409 of smoothed dose response surfaces from A. Concentrations and color scheme are the same as in A (C,  
 1410 D) Analysis of drug synergy according to excess over Bliss and highest single agent (HSA).  
 1411 Concentrations are the same as in A. (E) Decomposition of pERK model simulations at 5 min after EGF  
 1412 stimulation (left) in BRAF<sup>V600E</sup> (middle) and RAS (right) channels. Color and concentrations are the same  
 1413 as in A. (F) Drug interaction analysis for decomposed channels. Color is and concentrations are the same  
 1414 as in A. (G) Quantification of signaling gain in the physiological signaling challenge. Pointwise  
 1415 multiplication is indicated by  $\times$ . Reaction steps (Figure 4A) are indicated on top. Purple and brown outlines  
 1416 indicate molecular mechanisms responsible for lower gain. Concentrations are the same as in A.

1417

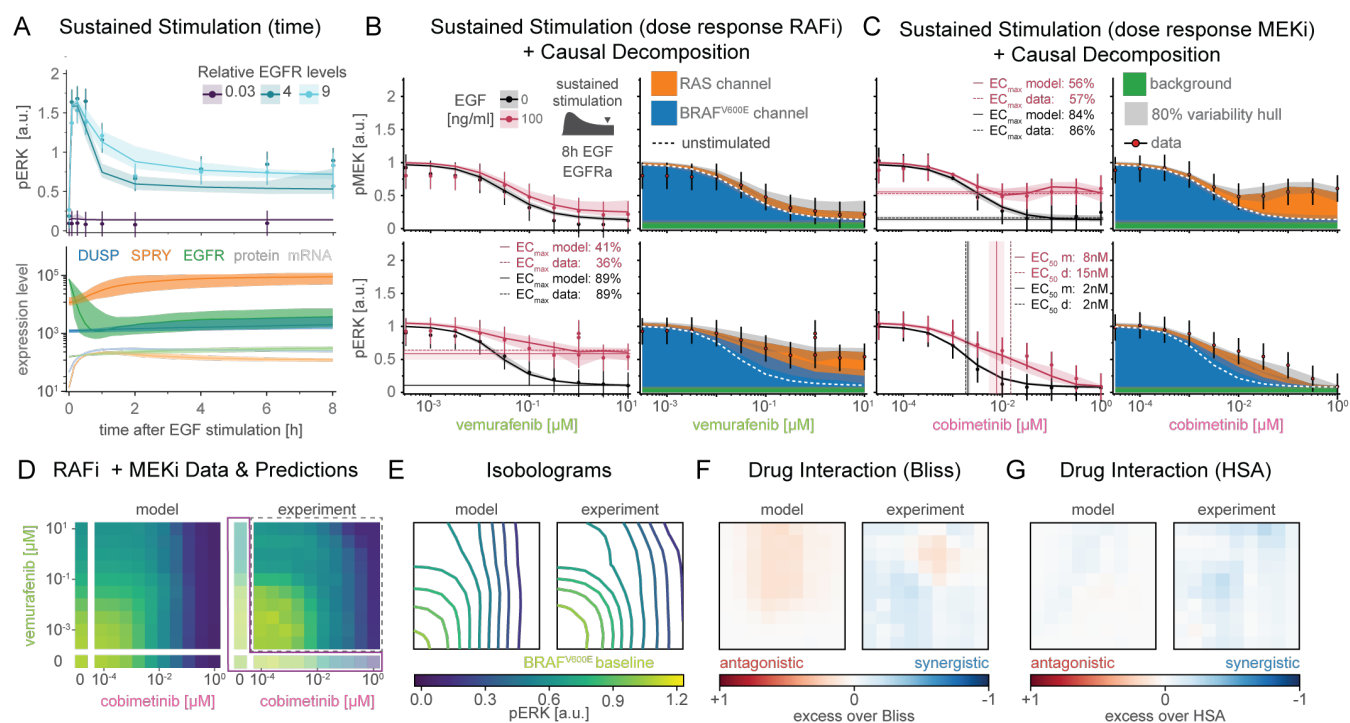

1418

1419 **Figure 6: Prediction of resistance from EGFR upregulation.** (A) Prediction of time course data for  
 1420 three different clones (two overexpression, one knockdown). Solid line show medians. Shading indicates  
 1421 variability across 80% of parameter sets. Top plot shows pERK response. Bottom plot shows mRNA (light  
 1422 colors) and protein (dark color) expression level changes. (B, C) Prediction of dose response data with  
 1423 and without EGF at 8 hours after stimulation in response to vemurafenib (B), cobimetinib (C). Left panels  
 1424 show EGF stimulated (red) and unstimulated (black) conditions. Right panels show decomposed model  
 1425 simulations for EGF stimulated conditions. Data is shown as point-ranges. Median (over parameter sets)  
 1426 simulations are shown as stacked areas. Shading indicates 80% percentiles over parameter sets.  
 1427 Simulations for EGF unstimulated conditions are shown as white dashed line. (D) Experimental data and  
 1428 model simulations for pERK combination response at 8h after EGF stimulation. Training data has lower  
 1429 opacity and purple outline. Test data has a grey, dashed outline. (E) Isobolograms of smoothed dose  
 1430 response surfaces from A. (F, G) Analysis of drug synergy according to excess over Bliss (F) and HSA  
 1431 (G).

1432



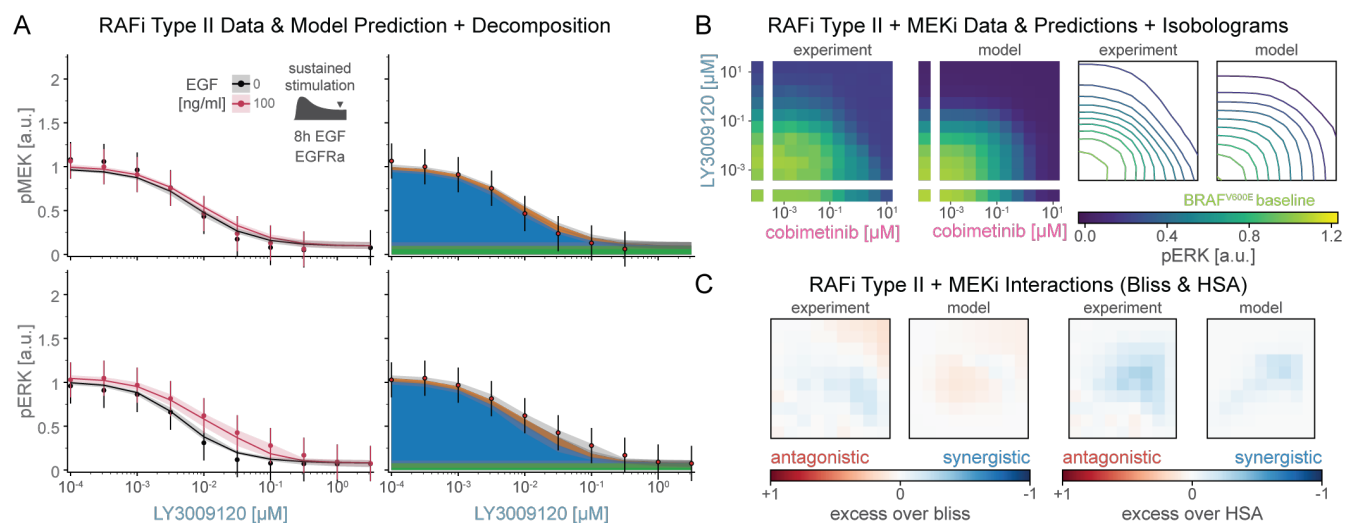

1433

1434 **Figure 7: Prediction of response to panRAF inhibitor LY3009120. (A)** Comparison of pMEK (top)  
1435 and pERK (bottom) dose response predictions and experimental validation for A375 EGFR-CRISPRa  
1436 with (red) and without (black) 8h of EGF stimulation. Solid lines and stacked areas show median (over  
1437 parameter sets) simulations. Shading indicates 80% percentiles over parameter sets. Data is shown as  
1438 point-ranges. **(B)** Drug combination response for A375 EGFR-CRISPRa 8h after EGF stimulation. **(C)**  
1439 Analysis of drug synergy according to excess over Bliss (left) and HSA (right).

1440

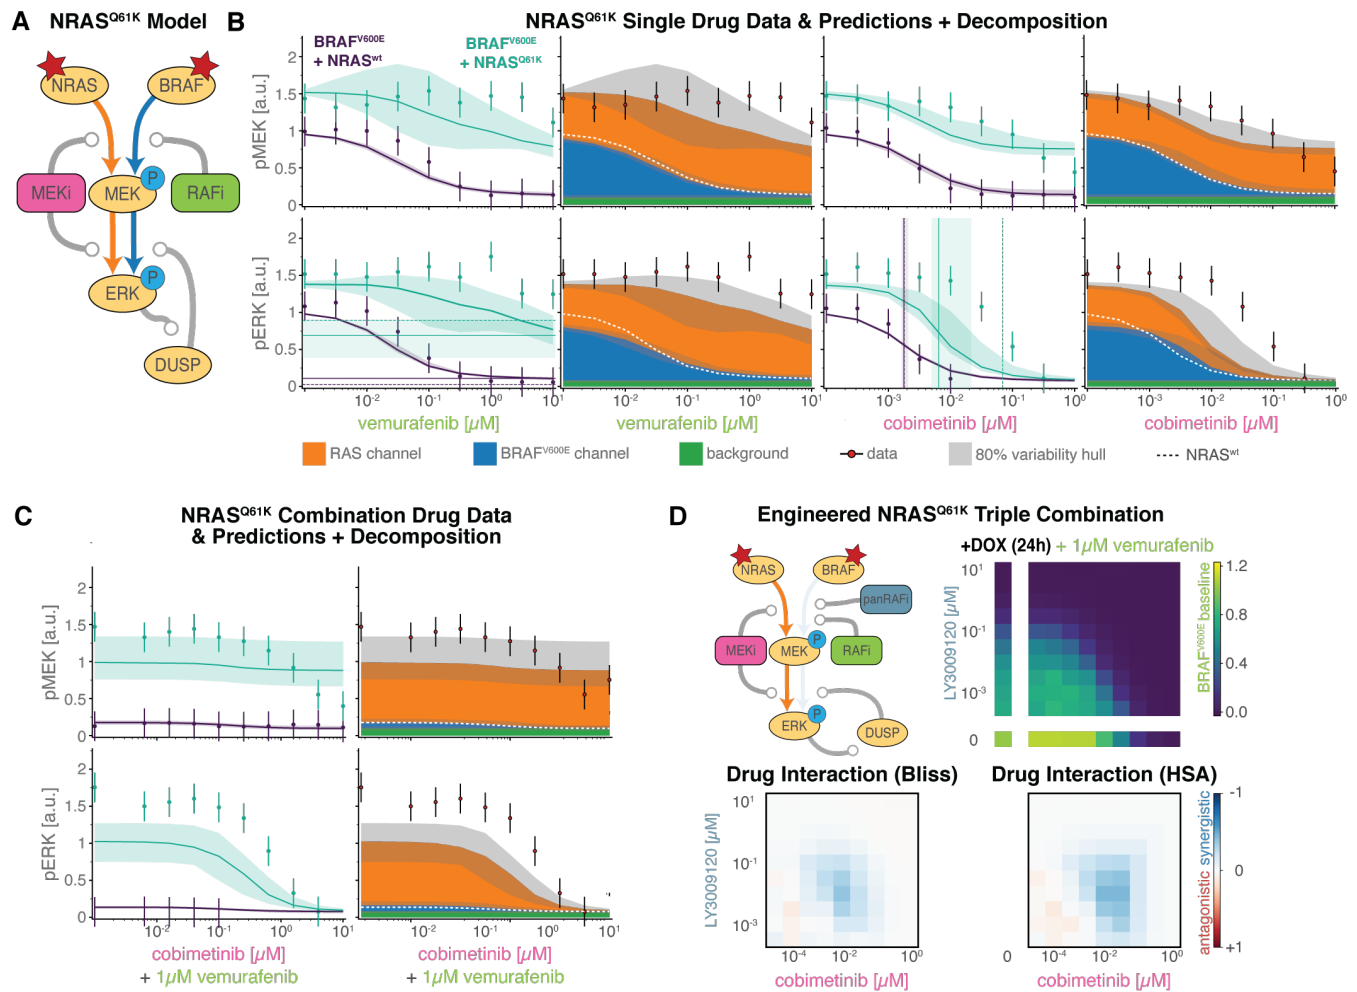

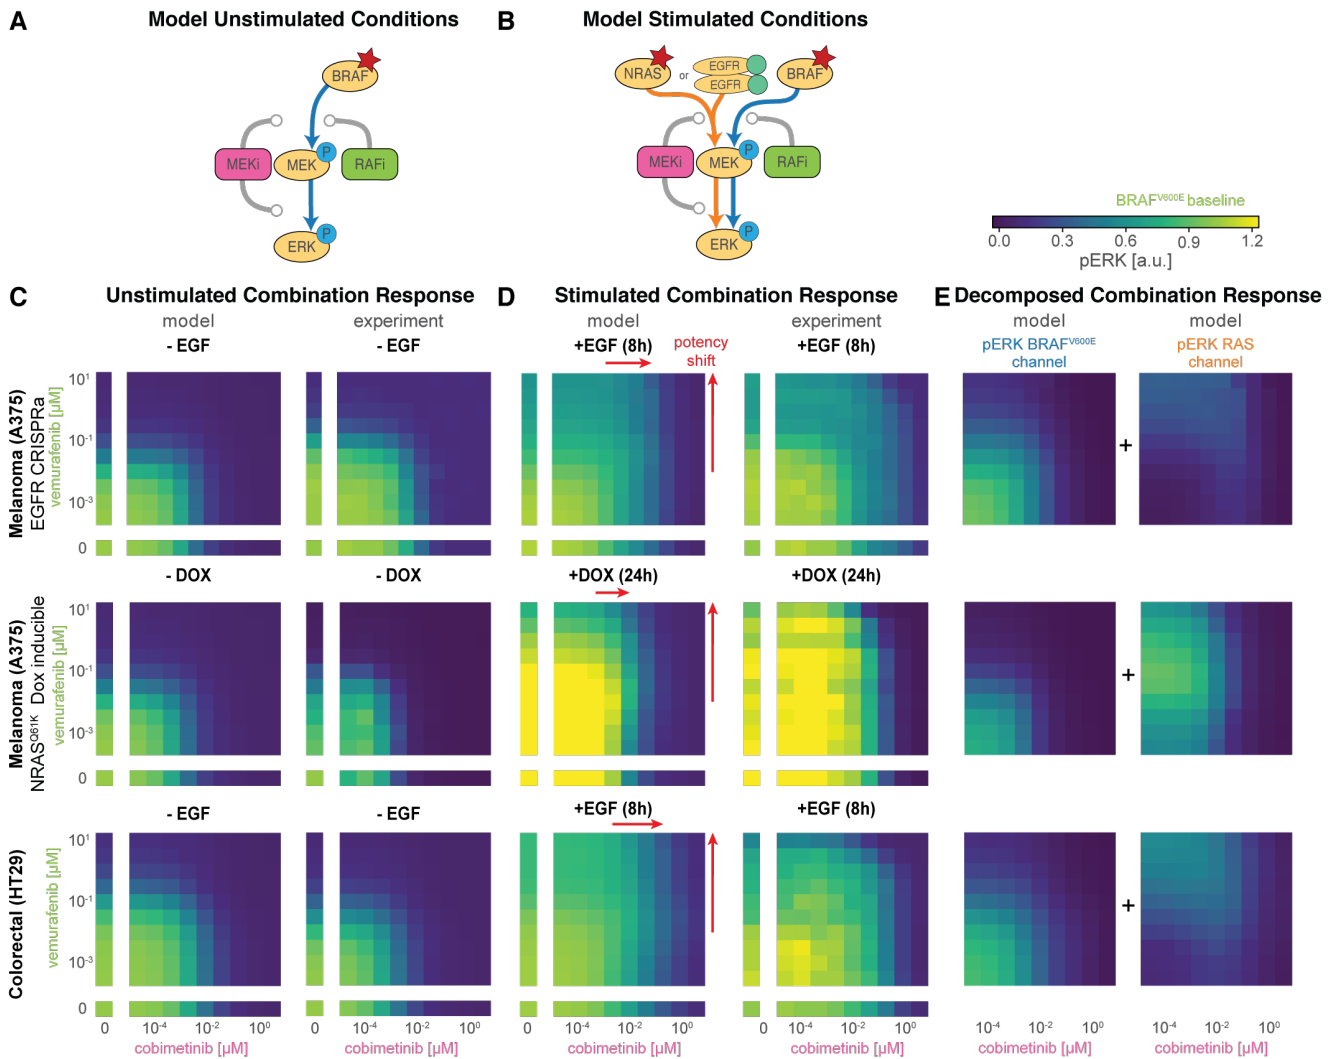

1452 **Figure 9: A unified model of drug resistance in BRAF-mutant cancers.** pERK Drug combination  
 1453 response for (i) A375 melanoma cell line EGFR-CRISPRa amplified cell line with (right) or without (left)  
 1454 8h of EGF stimulation (first row), (ii) A375 melanoma NRAS<sup>Q61K</sup> Dox-inducible cell line with (right) or  
 1455 without (left) 24h Dox stimulation (second row) and (iii) HT29 colorectal cell line with (right) or without  
 1456 (left) 8h EGF stimulation (third row).



1458 **Figure S1: Variability in parameter estimates. (A)** Boxplot of parameter estimates for best 50 parameter  
1459 sets. Optimization boundary is indicated as dashed lines. Type of parameters are indicated by suffix: `_kD`  
1460 (binding affinity), `_offset` (background intensity), `_kcatr` (normalized `kcat`), `_deltaG` (thermodynamic  
1461 parameter), `kdeg` (degradation rate), `kbase` (baseline phosphorylation rate), `kM` (pERK concentration at  
1462 which 50% activation is achieved), `scale` (observable scaling), `_0` (expression level), `_eq` (baseline  
1463 expression level), `_kf` (binding rate), `_kcat` (catalytic rate), `_gexpslope` (RNA synthesis scaling factor).  
1464 **(B)** Correlation plots of parameter estimates. Only statistically significant ( $p > 0.05$ ) correlations are shown.  
1465 Coloring shows positive/negative correlation.

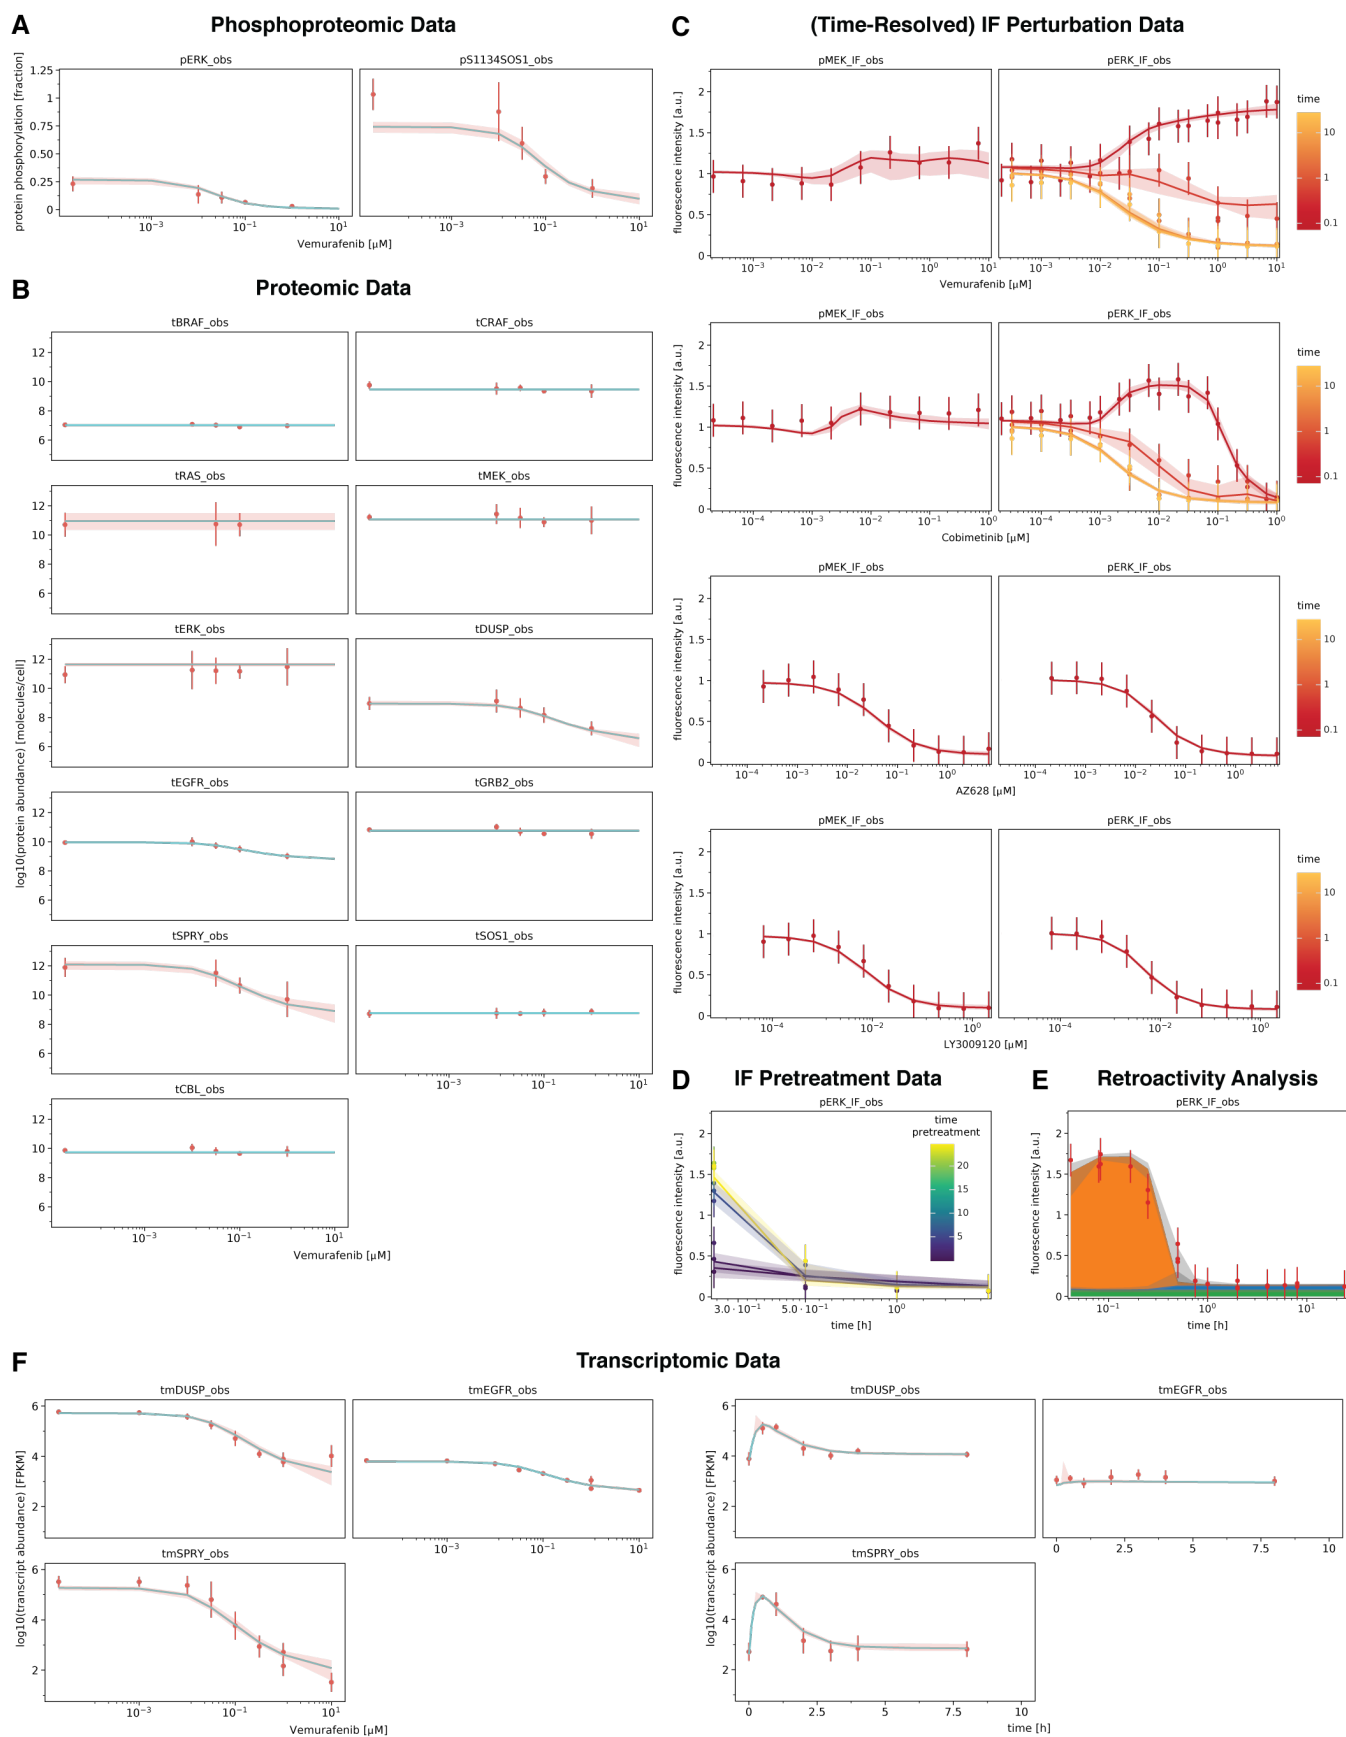



1467 **Figure S2: Overview calibrated model simulation and experimental data.** Data is shown as point-  
1468 ranges. Median (over parameter sets) simulations are shown as thick lines. Shading indicates 80%  
1469 percentiles over parameter sets. **(A)** Phosphoproteomic training data (RAFi dose response) **(B)** Proteomic  
1470 training data (RAFi dose response). **(C)** Additional immunofluorescence data (time resolved RAFi and  
1471 MEKi dose-response) **(D)** Pretreatment data (timecourse). Pretreatment time indicates the time between  
1472 drug treatment (1 $\mu$ M vemurafenib) and EGF addition (100ng/ml). **(E)** Causal decomposition of pERK  
1473 timecourse (1 $\mu$ M vemurafenib) for a modified model in which DUSP can simultaneously bind pERK in  
1474 the RAS and BRAF<sup>V600E</sup> channel, preventing retroactivity between channels through DUSP sequestration.  
1475 **(F)** Transcriptomic training data (RAFi dose response and timecourse)

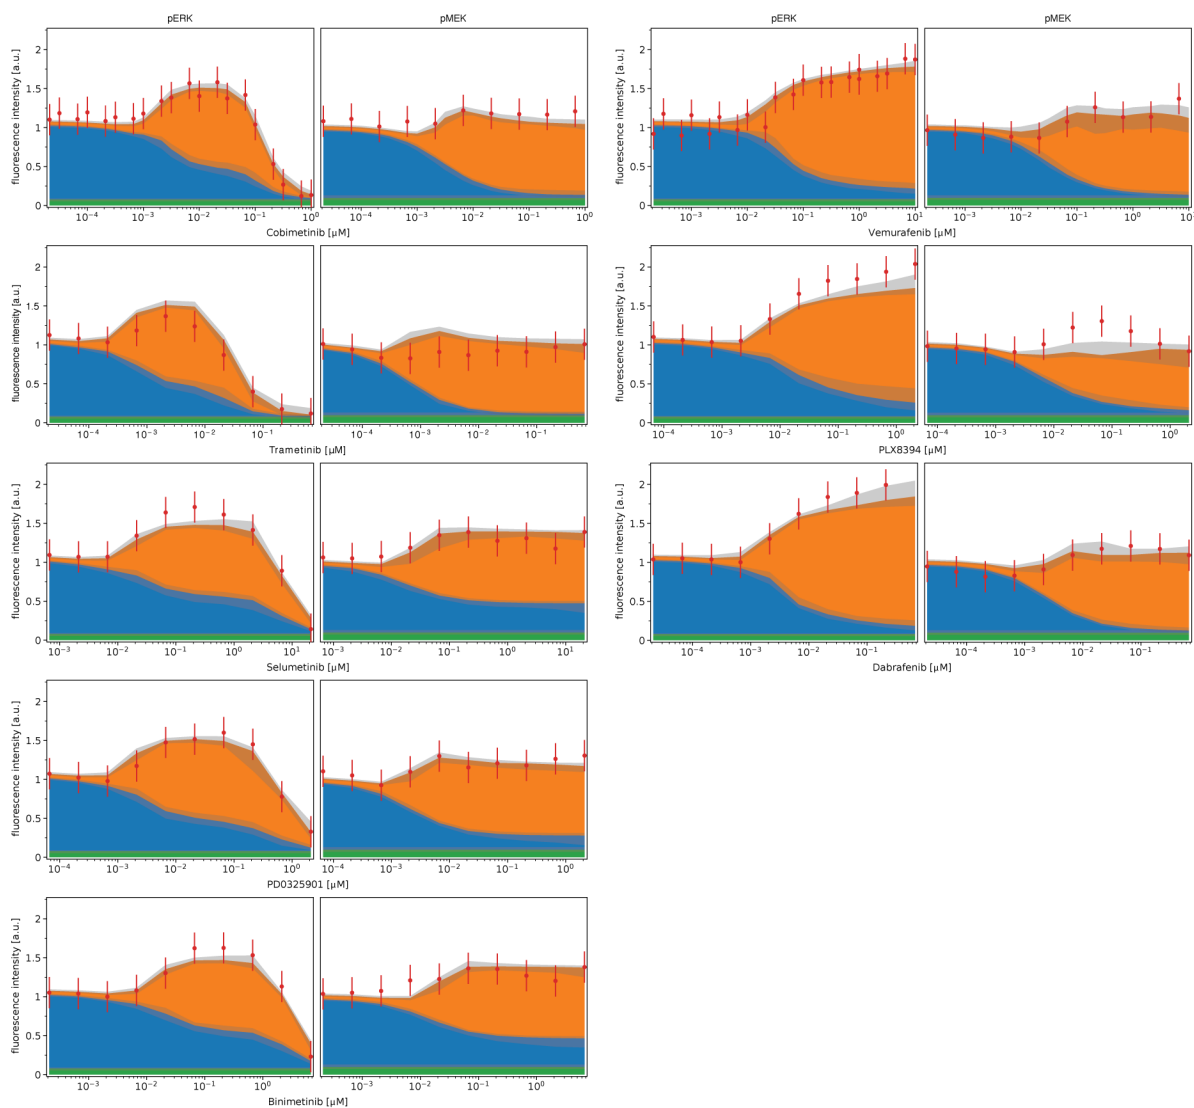

1476

1477 **Figure S3: Causal Decomposition of RAS and BRAF<sup>V600E</sup> channels (extended).** Comparison of  
1478 experimental data and decomposed model simulations at 5 minutes after EGF stimulation for 5 different  
1479 MEK inhibitors and 3 different RAF inhibitors. Data is shown as point-ranges. Median (over parameter  
1480 sets) simulations are shown as stacked areas with color corresponding to channels (blue: BRAF<sup>V600E</sup>,  
1481 orange: RAS). Shading indicates 80% percentiles over parameter sets.

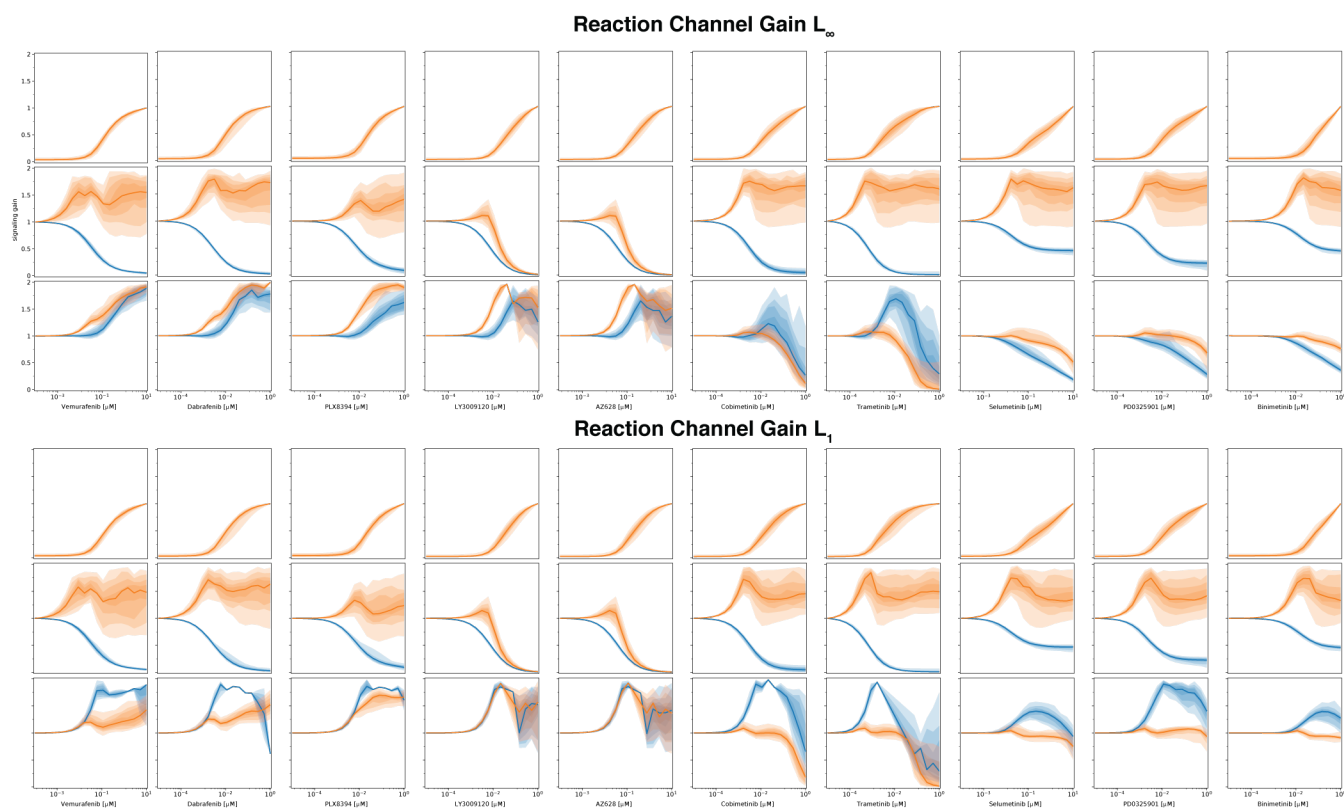

1482

1483 **Figure S4: Quantification of signal transduction in RAS and BRAF<sup>V600E</sup> channels (extended).**  
1484 Quantification of signal transmissions in terms of signaling gain ( $L_1$  and  $L_\infty$ ) along the edges of the  
1485 simplified network in Figure 4A for different concentrations of 5 different RAF inhibitors and 5 different  
1486 MEK inhibitors. Color indicates the reaction channel (blue: BRAF<sup>V600E</sup>, orange: RAS). Shading indicates  
1487 20, 40, 60 and 80% percentiles over parameter sets.

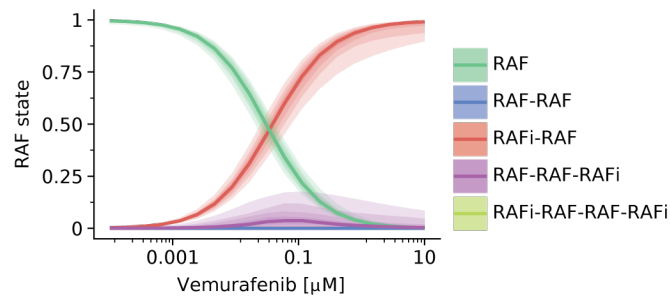

1488

1489 **Figure S5: Simulated Assembly RAF-RAFi complexes in response to vemurafenib.** Each color  
1490 corresponds to a different complex. Complex assembly was quantified for RAFi-adapted cells at 5 minutes  
1491 for dafter EGF stimulation. Shading indicates 20, 40, 60 and 80% percentiles over parameter sets.

1492

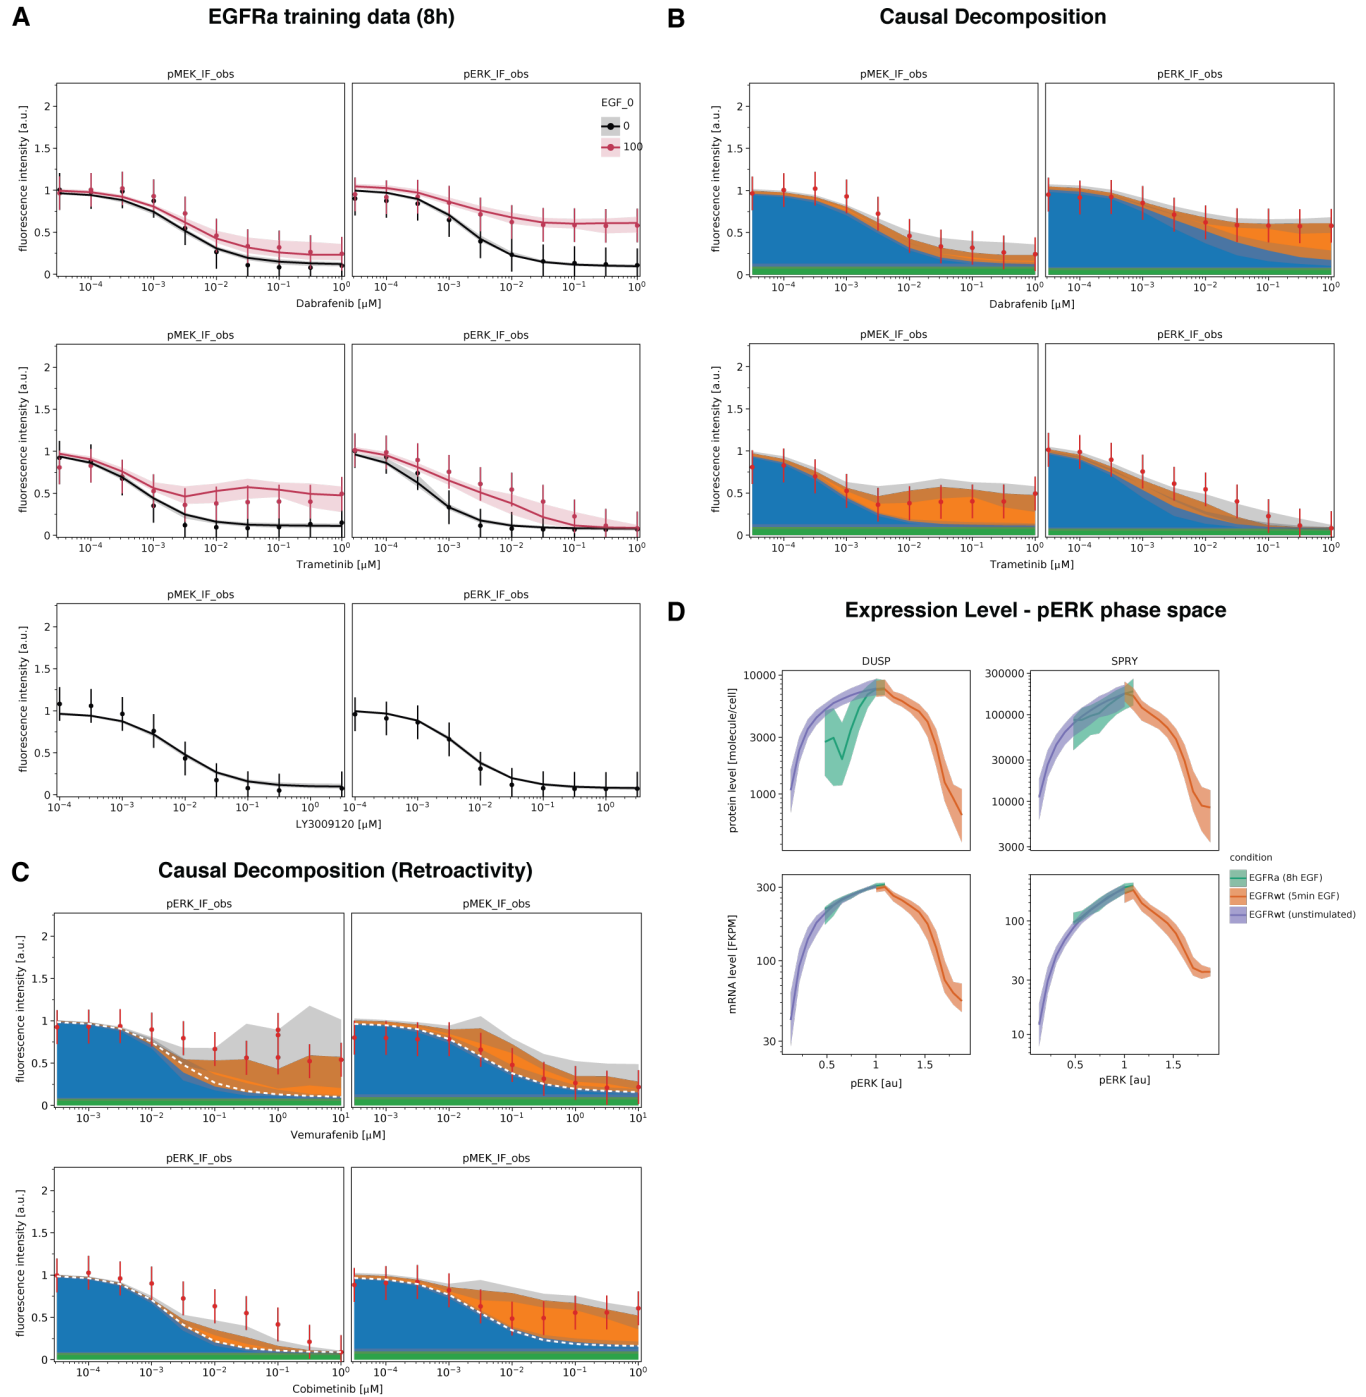

1493

1494 **Figure S6: Additional training data for EGFR upregulation and Causal Decomposition** (A) Model  
 1495 simulations and experimental data for EGF stimulated and unstimulated conditions. Data is shown as  
 1496 point-ranges. Median (over parameter sets) simulations are shown as thick lines. Shading indicates 80%  
 1497 percentiles over parameter sets. (B, C) Comparison of experimental data and decomposed model  
 1498 simulations at 5 minutes after EGF stimulation. Data is shown as point-ranges. Median (over parameter  
 1499 sets) simulations are shown as stacked areas with color corresponding to channels (blue: BRAF<sup>V600E</sup>,  
 1500 orange: RAS). Shading indicates 80% percentiles over parameter sets. C shows causal decomposition of  
 1501 EGF stimulated pMEK and pERK dose response for a modified model in which DUSP can simultaneously

1502 bind pERK in the RAS and BRAF<sup>V600E</sup> channel, preventing retroactivity between channels through DUSP  
1503 sequestration. Unstimulated baseline indicated by white dashed lines.  
1504



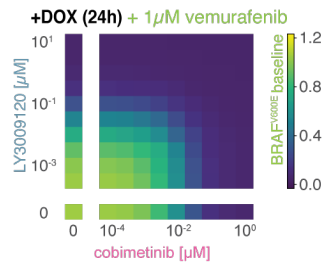

1505

1506 **Figure S5: Predicted dose response for combinations of LY3009120 and cobimetinib at 1uM**  
1507 **vemurafenib.** Simulations were performed for BRAF<sup>V600E</sup> NRAS<sup>Q61K</sup> double mutant cells that were  
1508 adapted to all three drugs.
